# Supplementary material for: High spatiotemporal resolution traffic CO 2 emission maps derived from Floating Car Data (FCD) for 20 European cities (2023)
Source: Copernicus journal article supplement (doi:10.5194/essd-2025-458), 2025-08-26
Supplement: Supplementary file 1 [file essd-2025-458-supplement.zip]

Support information for

**High spatiotemporal resolution traffic CO<sub>2</sub> emission maps  
derived from Floating Car Data (FCD) for 20 European cities  
(2023)**

Qinren Shi<sup>1</sup>, Philippe Ciais<sup>1</sup>, Nicolas Megel<sup>2</sup>, Xavier Bonnemaizon<sup>1</sup>, Rohith Teja Mittakola<sup>1</sup>,  
Richard Engelen<sup>3</sup>, Chuanlong Zhou<sup>1</sup>

<sup>1</sup>Le Laboratoire des Sciences du Climat et de l'Environnement, Saint-Aubin, 91190, France

<sup>2</sup>NEXQT SAS, Paris, France

<sup>3</sup>ECMWF, Robert-Schuman-Platz 3, 53175 Bonn, Germany

*Correspondence to:* Qinren Shi([qinrenshi2025@gmail.com](mailto:qinrenshi2025@gmail.com)) & Chuanlong Zhou([chuanlong.zhou@lsce.ipsl.fr](mailto:chuanlong.zhou@lsce.ipsl.fr))

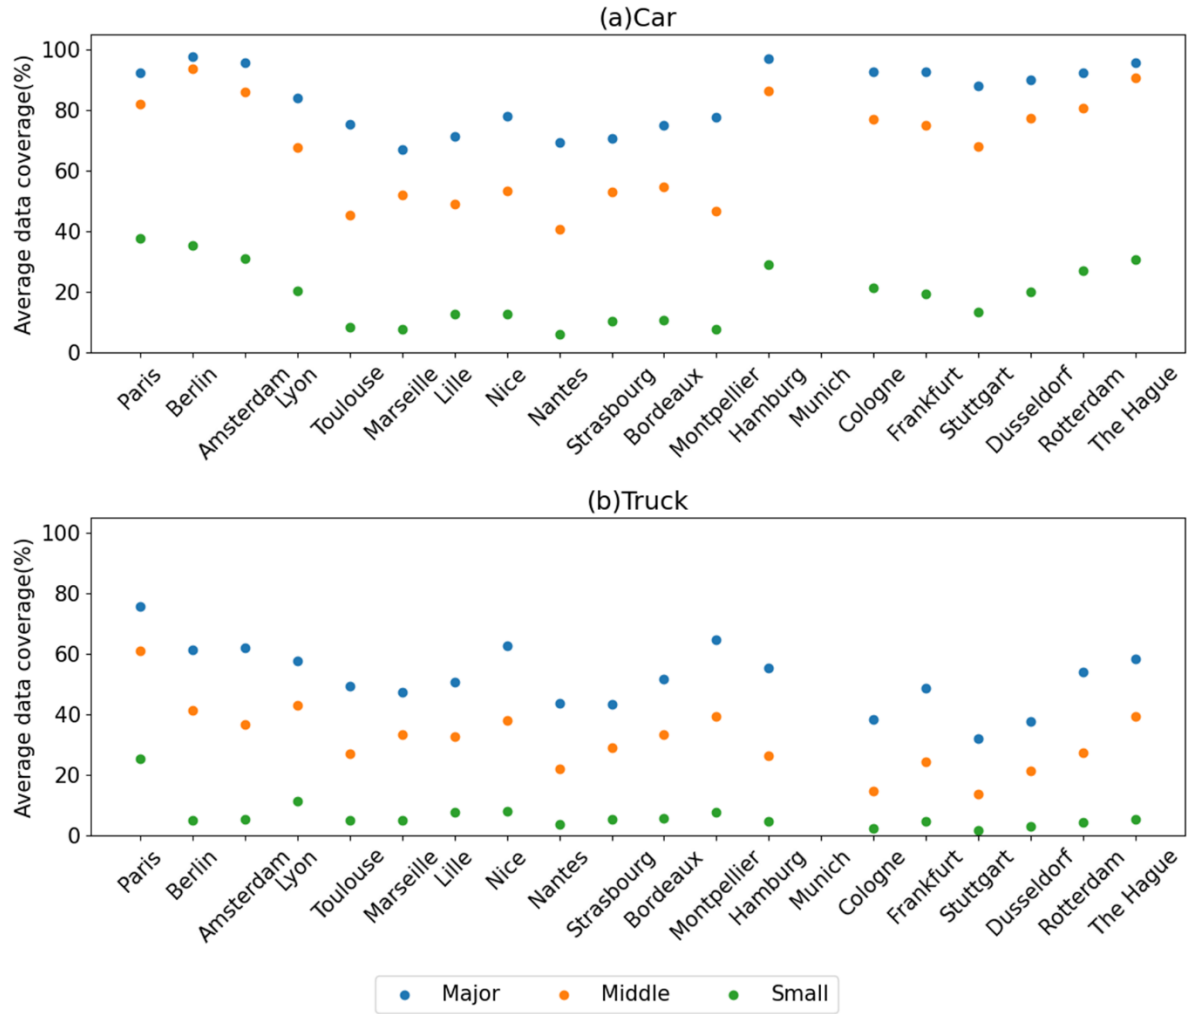

Figure S1: FCD data coverage in 20 cities

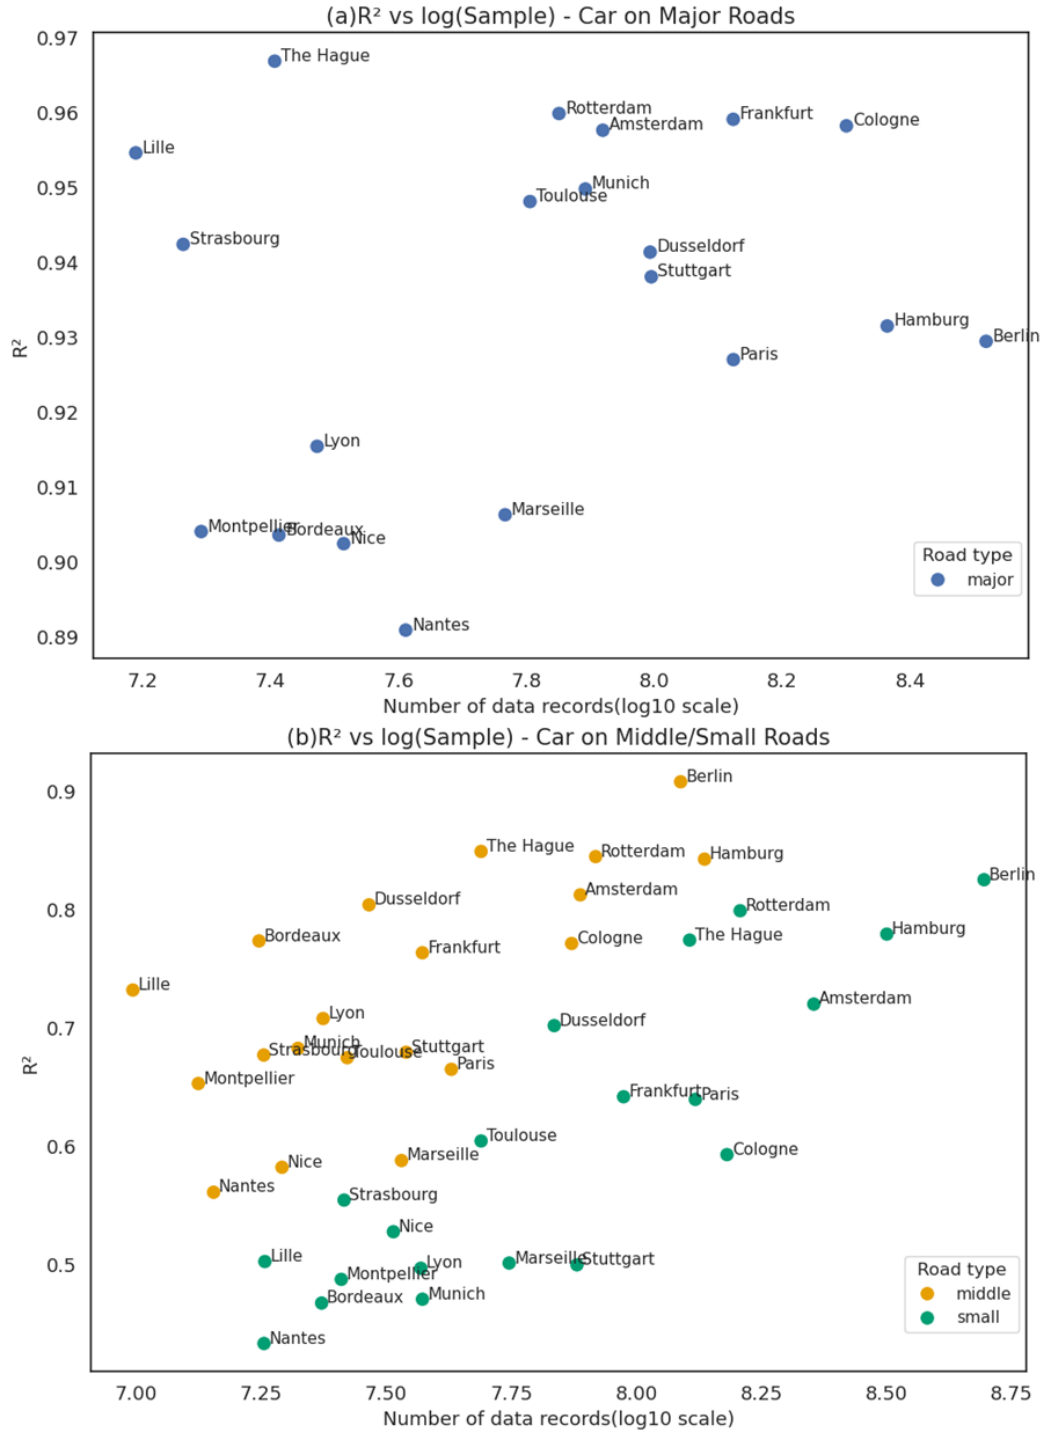

Figure S2: Training  $R^2$  of Car counts in 20 cities. (a) and (b) shows results in major roads and middle/small roads, respectively.

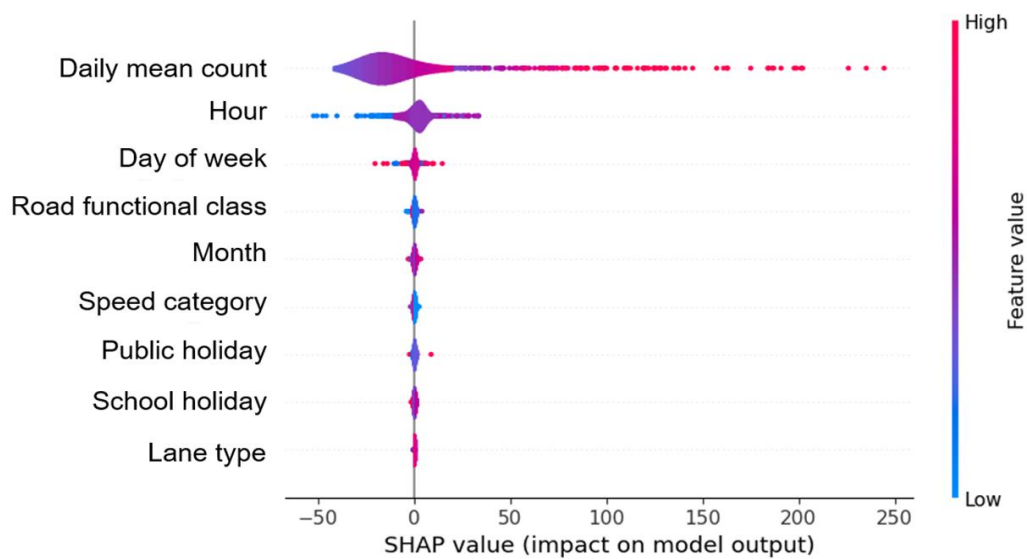

Figure S3: SHAP summary plot

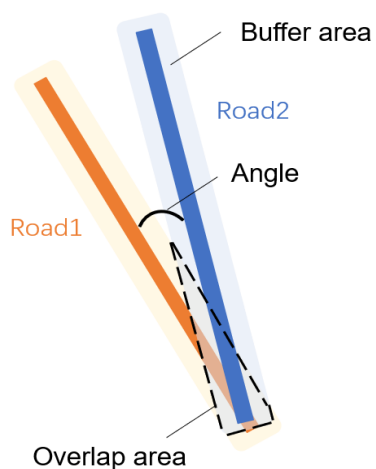

Figure S4: Schematic of matching roads between Opendata and FCD in Paris

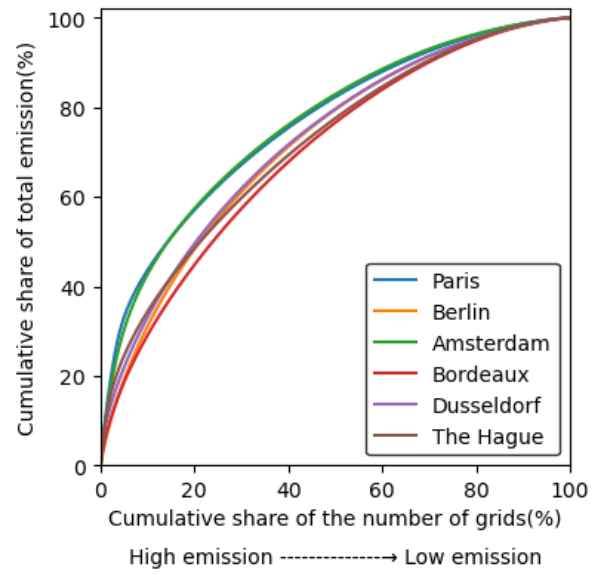

**Figure S5: Cumulative curve of grids' emissions in six cities**

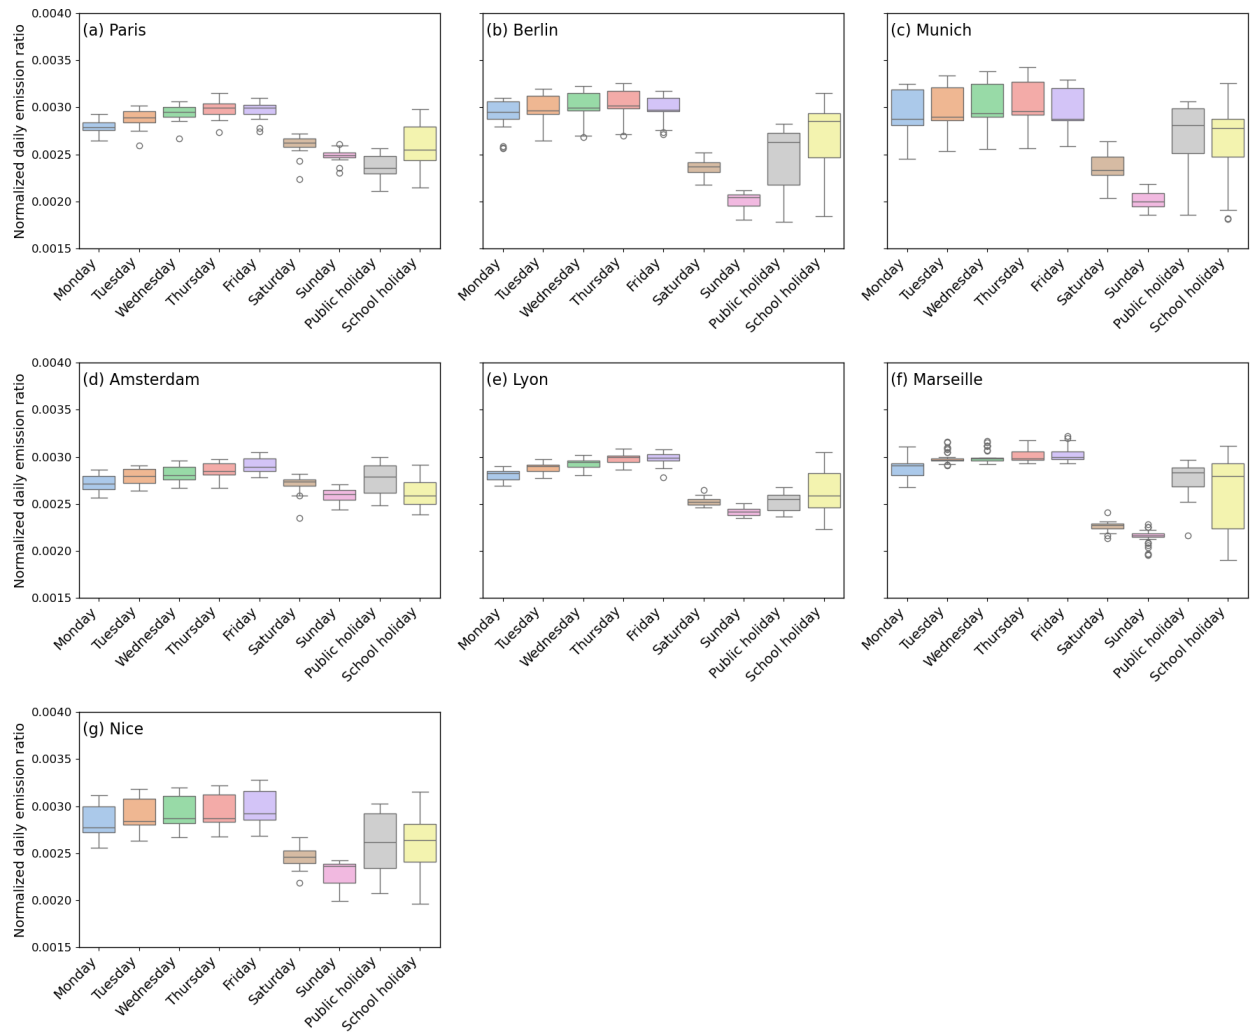

**Figure S6: Weekly patterns for the seven cities**

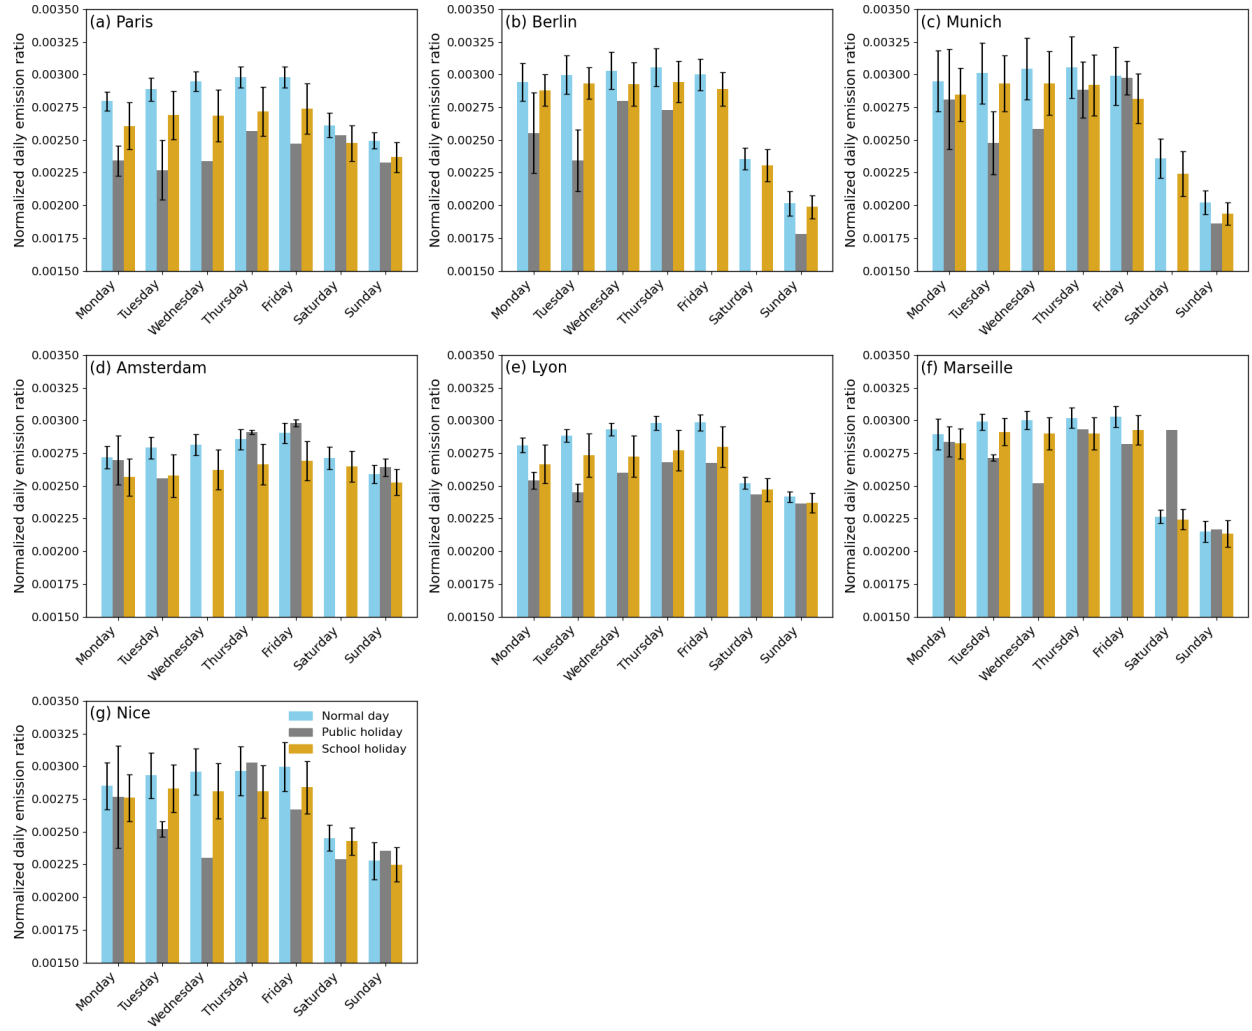

**Figure S7: Variations in normalized daily traffic-related CO<sub>2</sub> emissions by weekday and day type in seven cities.**

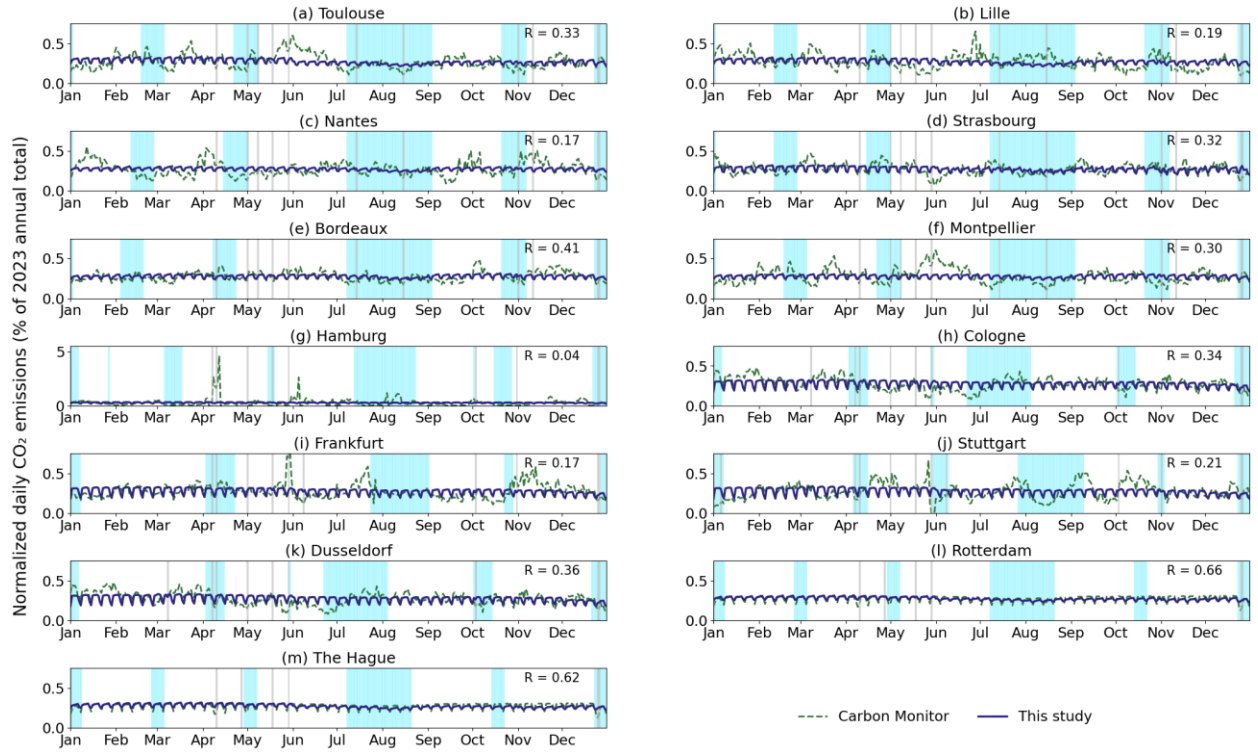

**Figure S8: Normalized daily CO<sub>2</sub> emission of 13 cities in 2023.** Y-axis represents each day's CO<sub>2</sub> emissions divided by the city's total emissions in 2023. The light blue and grey shades represent school holidays and public holidays, respectively. The y-axis represents each day's CO<sub>2</sub> emissions divided by the city's total emissions in 2023.
