# Supplementary material for: High spatiotemporal resolution traffic CO 2 emission maps derived from Floating Car Data (FCD) for 20 European cities (2023)
Source: Copernicus journal article supplement (doi:10.5194/essd-2025-458), 2025-08-26
Supplement: Supplementary file 1 [file essd-2025-458-supplement.zip]

## Sheet: Content
Content
Table S1 Comparison of machine learning models, Paris, 2023
Table S2 Validation Results of LightGBM for Filling Data Gaps in 20 Cities
Table S3 The parameters of the fitting results of emission factors
Table S4 Validation Results of LightGBM for converting FCD sample counts to traffic volumes
Table S5 Vehicle categories
Table S6 Data sources of fleet structures
Table S7 Comparison of annual emissions with other data sources

## Sheet: Table S1 
Table S1 Comparison of machine learning models, Paris, 2023
Vehicle type	Item	Sample	Road	Model	R2	RMSE	MAE	Time
Car	COUNT	132873605	major	RF	0.92	11.83	7.05	122.53
				LightGBM	0.93	11.39	6.84	6.25
		42706851	middle	RF	0.66	5.03	3.6	27.37
				LightGBM	0.67	4.97	3.57	2.26
		131242827	small	RF	0.64	3.04	2	97.4
				LightGBM	0.64	3.03	2	5.54
	SPEED	132873605	major	RF	0.82	6.18	4.31	120.69
				LightGBM	0.83	6.09	4.25	6.8
		42706851	middle	RF	0.55	5.54	4.11	27.45
				LightGBM	0.55	5.52	4.1	2.29
		131242827	small	RF	0.39	6.84	5.08	101.48
				LightGBM	0.39	6.83	5.08	6.5
Truck	COUNT	114476308	major	RF	0.86	6.31	3.6	101.14
				LightGBM	0.87	6.17	3.54	5.19
		33935965	middle	RF	0.69	3.24	2.22	22.28
				LightGBM	0.69	3.21	2.21	1.84
		89666394	small	RF	0.57	2.26	1.49	69.71
				LightGBM	0.57	2.25	1.48	4.07
	SPEED	114476308	major	RF	0.79	7.19	5.17	102.12
				LightGBM	0.79	7.11	5.12	5.95
		33935965	middle	RF	0.45	6.21	4.68	24.49
				LightGBM	0.45	6.19	4.67	1.72
		89666394	small	RF	0.36	6.87	5.18	57.66
				LightGBM	0.36	6.86	5.17	4.55

## Sheet: Table S2
Table S2 Validation Results of LightGBM for Filling Data Gaps in 20 Cities
city	Vehicle	Item	Road	Number of samples	R2	RMSE	MAE	Time
Paris	Car	COUNT	major	132873605	0.926982	11.3857	6.84449	6.25004
			middle	42706851	0.665164	4.97385	3.57049	2.25714
			small	131242827	0.63977	3.03163	1.99609	5.54353
		SPEED	major	132873605	0.829807	6.08505	4.25465	6.79939
		SPEED	middle	42706851	0.549678	5.52228	4.09701	2.29128
		SPEED	small	131242827	0.390519	6.83226	5.08013	6.49845
	Truck	COUNT	major	114476308	0.870506	6.16877	3.53764	5.19086
	Truck	COUNT	middle	33935965	0.690469	3.20879	2.20647	1.83867
	Truck	COUNT	small	89666394	0.574631	2.24809	1.48488	4.07111
	Truck	SPEED	major	114476308	0.790732	7.11195	5.12441	5.9491
	Truck	SPEED	middle	33935965	0.45312	6.19221	4.66946	1.71518
	Truck	SPEED	small	89666394	0.357498	6.85848	5.17437	4.54831
Berlin	Car	COUNT	major	329972459	0.929423	35.5109	21.268	14.0009
	Car	COUNT	middle	122671072	0.908054	19.1623	12.1764	4.73824
	Car	COUNT	small	495537305	0.825326	7.4978	4.25766	19.0144
	Car	SPEED	major	329972459	0.906692	4.65954	3.14256	14.9268
	Car	SPEED	middle	122671072	0.787788	4.88768	3.37852	5.36266
	Car	SPEED	small	495537305	0.635088	7.12496	4.9985	21.1582
	Truck	COUNT	major	230475153	0.63303	2.75304	1.85271	8.48283
	Truck	COUNT	middle	67079350	0.553563	2.01977	1.40937	2.19714
	Truck	COUNT	small	89670509	0.412926	1.56024	1.02285	2.66613
	Truck	SPEED	major	230475153	0.770155	8.13413	5.98222	9.016
	Truck	SPEED	middle	67079350	0.534918	7.84219	5.88382	2.66905
	Truck	SPEED	small	89670509	0.554487	7.62772	5.72623	3.28879
Amsterdam	Car	COUNT	major	83050579	0.957602	39.7527	19.1886	2.93685
	Car	COUNT	middle	77300475	0.812539	10.4125	6.13515	2.8683
	Car	COUNT	small	226391452	0.720245	5.14403	2.82283	7.78152
	Car	SPEED	major	83050579	0.948935	5.86768	3.77849	3.2123
	Car	SPEED	middle	77300475	0.761574	5.74816	4.02122	3.26188
	Car	SPEED	small	226391452	0.606555	7.49886	5.24508	9.41771
	Truck	COUNT	major	56226710	0.747593	2.57892	1.7339	1.65264
	Truck	COUNT	middle	37848466	0.548246	1.53639	1.07447	1.1802
	Truck	COUNT	small	46532444	0.445261	1.27892	0.854878	1.2093
	Truck	SPEED	major	56226710	0.898413	8.81465	6.3116	1.86831
	Truck	SPEED	middle	37848466	0.569218	7.91091	5.94908	1.42792
	Truck	SPEED	small	46532444	0.574497	7.53235	5.57123	1.76358
Lyon	Car	COUNT	major	29701229	0.91541	6.58053	4.14902	1.54754
	Car	COUNT	middle	23671352	0.708063	3.49297	2.43656	1.63156
	Car	COUNT	small	37108332	0.49712	2.39065	1.58405	2.23588
	Car	SPEED	major	29701229	0.809446	6.89141	4.90089	1.90365
	Car	SPEED	middle	23671352	0.540635	6.81582	5.07807	1.63223
	Car	SPEED	small	37108332	0.461275	7.46683	5.57049	2.56507
	Truck	COUNT	major	21541726	0.775737	2.97607	1.97735	1.45413
	Truck	COUNT	middle	15945005	0.591428	2.19269	1.52396	1.05706
	Truck	COUNT	small	21364422	0.450549	1.70648	1.15733	1.36828
	Truck	SPEED	major	21541726	0.74433	8.31896	6.08736	1.49282
	Truck	SPEED	middle	15945005	0.475308	7.28461	5.53849	1.19522
	Truck	SPEED	small	21364422	0.417205	7.44499	5.64274	1.49437
Toulouse	Car	COUNT	major	63898350	0.948083	6.91207	3.98716	1.62848
Toulouse	Car	COUNT	middle	26445446	0.674976	2.58244	1.75719	0.751597
Toulouse	Car	COUNT	small	48968377	0.604639	2.02318	1.30141	1.14726
Toulouse	Car	SPEED	major	63898350	0.899261	7.48836	5.26376	2.01004
Toulouse	Car	SPEED	middle	26445446	0.622095	7.22988	5.30686	0.816737
Toulouse	Car	SPEED	small	48968377	0.604991	8.04588	5.84716	1.45628
Toulouse	Truck	COUNT	major	45245362	0.821539	3.08034	1.95226	1.17066
Toulouse	Truck	COUNT	middle	16847071	0.635385	1.99996	1.34559	0.44086
Toulouse	Truck	COUNT	small	28671982	0.604023	1.73779	1.12318	0.626003
Toulouse	Truck	SPEED	major	45245362	0.885818	8.7772	6.25912	1.27105
Toulouse	Truck	SPEED	middle	16847071	0.593866	7.19528	5.34053	0.503944
Toulouse	Truck	SPEED	small	28671982	0.620795	7.42912	5.47108	0.79365
Marseille	Car	COUNT	major	58429721	0.906269	5.14201	3.1326	2.40425
Marseille	Car	COUNT	middle	33952008	0.588122	2.59691	1.83111	1.42406
Marseille	Car	COUNT	small	55715936	0.501523	2.00929	1.28853	2.02777
Marseille	Car	SPEED	major	58429721	0.84968	8.57756	6.1075	2.60564
Marseille	Car	SPEED	middle	33952008	0.584889	7.86986	5.83708	1.64452
Marseille	Car	SPEED	small	55715936	0.545435	8.99555	6.42575	2.44336
Marseille	Truck	COUNT	major	43366310	0.785047	2.9167	1.88777	2.05048
Marseille	Truck	COUNT	middle	23392180	0.494529	1.917	1.34403	0.989777
Marseille	Truck	COUNT	small	37619086	0.525921	1.73003	1.13871	1.41924
Marseille	Truck	SPEED	major	43366310	0.839912	9.20472	6.63303	2.03778
Marseille	Truck	SPEED	middle	23392180	0.548106	8.1101	6.06363	1.06724
Marseille	Truck	SPEED	small	37619086	0.537505	8.66575	6.22079	1.69843
Lille	Car	COUNT	major	15465401	0.95458	6.29697	3.67832	0.676166
Lille	Car	COUNT	middle	9861778	0.732132	2.78257	1.91101	0.442987
Lille	Car	COUNT	small	18102853	0.502816	2.21027	1.4263	0.736899
Lille	Car	SPEED	major	15465401	0.858883	7.78416	5.5578	0.709674
Lille	Car	SPEED	middle	9861778	0.646353	7.89447	5.83656	0.490999
Lille	Car	SPEED	small	18102853	0.491278	7.44106	5.5101	0.898678
Lille	Truck	COUNT	major	11683900	0.898373	3.02318	1.89052	0.495383
Lille	Truck	COUNT	middle	7072634	0.629653	1.7715	1.23523	0.341343
Lille	Truck	COUNT	small	11301573	0.512177	1.57547	1.03398	0.434286
Lille	Truck	SPEED	major	11683900	0.834527	8.94371	6.50682	0.569013
Lille	Truck	SPEED	middle	7072634	0.569528	8.4033	6.29258	0.339713
Lille	Truck	SPEED	small	11301573	0.440814	7.40907	5.57564	0.507693
Nice	Car	COUNT	major	32680989	0.902413	6.29772	4.01323	1.44978
Nice	Car	COUNT	middle	19589739	0.582419	2.69756	1.89353	0.92357
Nice	Car	COUNT	small	32705159	0.527973	2.14421	1.44268	1.47183
Nice	Car	SPEED	major	32680989	0.898126	7.67296	5.40342	1.62344
Nice	Car	SPEED	middle	19589739	0.56473	8.33297	6.1131	1.01338
Nice	Car	SPEED	small	32705159	0.559313	8.7793	6.29018	1.61205
Nice	Truck	COUNT	major	27244263	0.796462	3.44224	2.22173	1.40169
Nice	Truck	COUNT	middle	14908164	0.513966	1.92326	1.34514	0.760289
Nice	Truck	COUNT	small	21873007	0.468234	1.70114	1.14139	0.884945
Nice	Truck	SPEED	major	27244263	0.867	9.15776	6.51234	1.47013
Nice	Truck	SPEED	middle	14908164	0.521304	8.53496	6.32967	0.80888
Nice	Truck	SPEED	small	21873007	0.546526	8.511	6.13271	1.09743
Nantes	Car	COUNT	major	40852335	0.890876	4.1413	2.57394	1.89732
Nantes	Car	COUNT	middle	14297781	0.561356	2.42115	1.5839	0.691358
Nantes	Car	COUNT	small	18032742	0.433571	1.66046	1.09102	0.735609
Nantes	Car	SPEED	major	40852335	0.829038	6.71284	4.80416	2.34834
Nantes	Car	SPEED	middle	14297781	0.564344	6.80411	5.08929	0.776303
Nantes	Car	SPEED	small	18032742	0.576722	7.51526	5.64583	0.878049
Nantes	Truck	COUNT	major	27661512	0.716792	2.22106	1.48417	1.2646
Nantes	Truck	COUNT	middle	8524097	0.403349	1.49319	1.0389	0.380644
Nantes	Truck	COUNT	small	11041682	0.439259	1.49803	0.989764	0.431484
Nantes	Truck	SPEED	major	27661512	0.799008	7.59108	5.50586	1.43249
Nantes	Truck	SPEED	middle	8524097	0.547166	7.11564	5.38221	0.404375
Nantes	Truck	SPEED	small	11041682	0.579821	7.26341	5.47228	0.514007
Strasbourg	Car	COUNT	major	18342086	0.942368	5.49502	3.46016	0.804956
Strasbourg	Car	COUNT	middle	18011822	0.677231	2.83211	1.95711	0.914428
Strasbourg	Car	COUNT	small	26066338	0.554716	2.25857	1.44044	1.05553
Strasbourg	Car	SPEED	major	18342086	0.871842	7.48913	5.28207	0.927289
Strasbourg	Car	SPEED	middle	18011822	0.612522	8.15046	6.05347	0.89109
Strasbourg	Car	SPEED	small	26066338	0.589802	8.4989	6.25121	1.2639
Strasbourg	Truck	COUNT	major	11797119	0.856609	3.10287	1.96539	0.508317
Strasbourg	Truck	COUNT	middle	10610278	0.53708	1.89252	1.319	0.498777
Strasbourg	Truck	COUNT	small	14270812	0.548762	1.88745	1.19195	0.555131
Strasbourg	Truck	SPEED	major	11797119	0.851269	8.21288	5.89117	0.539012
Strasbourg	Truck	SPEED	middle	10610278	0.538249	8.43257	6.34448	0.530412
Strasbourg	Truck	SPEED	small	14270812	0.589094	8.2687	6.06946	0.661825
Bordeaux	Car	COUNT	major	25885488	0.903567	5.5688	3.32572	1.139
Bordeaux	Car	COUNT	middle	17622878	0.773606	3.13801	2.12011	0.871774
Bordeaux	Car	COUNT	small	23508052	0.467729	1.94499	1.29934	0.95728
Bordeaux	Car	SPEED	major	25885488	0.820398	6.91636	4.97306	1.25375
Bordeaux	Car	SPEED	middle	17622878	0.666433	6.52178	4.7985	0.941364
Bordeaux	Car	SPEED	small	23508052	0.530737	7.16251	5.37591	1.12568
Bordeaux	Truck	COUNT	major	18740696	0.782646	3.02027	1.93788	0.807543
Bordeaux	Truck	COUNT	middle	11296121	0.694956	2.28485	1.5229	0.423966
Bordeaux	Truck	COUNT	small	12467770	0.485226	1.53182	1.0329	0.491924
Bordeaux	Truck	SPEED	major	18740696	0.79368	7.74195	5.66338	0.842816
Bordeaux	Truck	SPEED	middle	11296121	0.643136	6.775	5.04497	0.570956
Bordeaux	Truck	SPEED	small	12467770	0.530938	6.79561	5.12636	0.545311
Montpellier	Car	COUNT	major	19569645	0.904031	4.9114	3.24496	0.96782
Montpellier	Car	COUNT	middle	13329464	0.653174	2.46828	1.71965	0.586014
Montpellier	Car	COUNT	small	25734732	0.487743	1.88591	1.25285	1.09069
Montpellier	Car	SPEED	major	19569645	0.8401	7.70727	5.48065	1.04642
Montpellier	Car	SPEED	middle	13329464	0.577466	7.34923	5.48375	0.628564
Montpellier	Car	SPEED	small	25734732	0.571407	7.54039	5.60949	1.18115
Montpellier	Truck	COUNT	major	16581388	0.823783	3.41863	2.26315	0.863808
Montpellier	Truck	COUNT	middle	11433882	0.668072	2.27919	1.55477	0.566432
Montpellier	Truck	COUNT	small	26350379	0.489816	1.89143	1.26293	1.19949
Montpellier	Truck	SPEED	major	16581388	0.818439	8.35849	6.00901	0.841283
Montpellier	Truck	SPEED	middle	11433882	0.556316	7.0642	5.31296	0.558485
Montpellier	Truck	SPEED	small	26350379	0.56244	6.85698	5.17055	1.42879
Hamburg	Car	COUNT	major	231137077	0.93147	35.6792	21.1441	9.8777
Hamburg	Car	COUNT	middle	136915680	0.842684	13.998	8.58326	5.61406
Hamburg	Car	COUNT	small	316770094	0.779385	7.50017	3.92038	11.4463
Hamburg	Car	SPEED	major	231137077	0.916486	5.1539	3.43665	10.2872
Hamburg	Car	SPEED	middle	136915680	0.754375	5.71567	3.98773	6.82673
Hamburg	Car	SPEED	small	316770094	0.648552	7.61422	5.31473	13.9016
Hamburg	Truck	COUNT	major	149654091	0.879126	4.53697	2.51591	5.58529
Hamburg	Truck	COUNT	middle	54412530	0.829802	2.49995	1.48211	1.88571
Hamburg	Truck	COUNT	small	58607067	0.841349	4.01752	1.8364	1.79254
Hamburg	Truck	SPEED	major	149654091	0.807809	8.44391	6.11016	6.60211
Hamburg	Truck	SPEED	middle	54412530	0.546741	8.0486	6.03395	2.38247
Hamburg	Truck	SPEED	small	58607067	0.622506	7.46922	5.42847	2.59349
München	Car	COUNT	major	77994531	0.949754	17.2036	8.35869	2.1305
München	Car	COUNT	middle	21090014	0.682898	3.55244	2.34405	0.682437
München	Car	COUNT	small	37383357	0.470978	2.99597	1.7833	1.05397
München	Car	SPEED	major	77994531	0.916832	8.30409	5.60709	2.64985
München	Car	SPEED	middle	21090014	0.792705	7.6913	5.50967	0.743786
München	Car	SPEED	small	37383357	0.640466	8.82971	6.0933	1.20189
München	Truck	COUNT	major	45630404	0.789746	5.23496	2.5275	1.51459
München	Truck	COUNT	middle	7475778	0.530586	1.56931	1.06103	0.229252
München	Truck	COUNT	small	11767008	0.610687	2.09515	1.22255	0.309375
München	Truck	SPEED	major	45630404	0.890879	9.87095	6.95022	1.55855
München	Truck	SPEED	middle	7475778	0.764561	7.59108	5.58451	0.249189
München	Truck	SPEED	small	11767008	0.648614	7.61914	5.45283	0.397611
Köln	Car	COUNT	major	199570839	0.958187	22.4532	12.6332	6.54688
Köln	Car	COUNT	middle	74283387	0.771458	7.89528	5.02852	2.42759
Köln	Car	COUNT	small	151809510	0.593101	4.88501	2.84328	4.76297
Köln	Car	SPEED	major	199570839	0.927059	5.9841	3.99443	6.95068
Köln	Car	SPEED	middle	74283387	0.682473	6.00121	4.28041	2.88958
Köln	Car	SPEED	small	151809510	0.615974	7.67433	5.32207	5.90126
Köln	Truck	COUNT	major	99554595	0.773163	3.78661	1.9114	3.44205
Köln	Truck	COUNT	middle	19278174	0.446054	1.43665	0.979119	0.614109
Köln	Truck	COUNT	small	19881498	0.518479	1.97183	1.15578	0.580187
Köln	Truck	SPEED	major	99554595	0.850943	9.92951	7.25945	3.50101
Köln	Truck	SPEED	middle	19278174	0.476064	8.38014	6.30011	0.765798
Köln	Truck	SPEED	small	19881498	0.629321	8.07446	5.7514	0.729597
Frankfurt	Car	COUNT	major	132803156	0.95906	16.0411	9.11925	4.65001
Frankfurt	Car	COUNT	middle	37374699	0.76362	5.85958	3.84133	1.41568
Frankfurt	Car	COUNT	small	94334293	0.641998	4.42146	2.61279	2.93243
Frankfurt	Car	SPEED	major	132803156	0.946205	6.08521	4.16994	5.16753
Frankfurt	Car	SPEED	middle	37374699	0.715108	6.44151	4.6137	1.65381
Frankfurt	Car	SPEED	small	94334293	0.624899	7.90738	5.4819	3.54122
Frankfurt	Truck	COUNT	major	77593318	0.774306	3.61554	1.93802	2.4448
Frankfurt	Truck	COUNT	middle	14389569	0.711559	1.6737	1.13224	0.486099
Frankfurt	Truck	COUNT	small	23448394	0.725866	2.29483	1.29733	0.659881
Frankfurt	Truck	SPEED	major	77593318	0.888663	9.69061	7.03856	3.24735
Frankfurt	Truck	SPEED	middle	14389569	0.575208	8.14845	6.05741	0.584271
Frankfurt	Truck	SPEED	small	23448394	0.589268	8.109	5.77356	0.866501
Stuttgart	Car	COUNT	major	98881617	0.938038	11.3684	6.85064	3.40083
Stuttgart	Car	COUNT	middle	34686174	0.679604	4.78538	3.34345	1.25271
Stuttgart	Car	COUNT	small	76126311	0.500036	3.38786	2.07327	2.14487
Stuttgart	Car	SPEED	major	98881617	0.875315	6.29818	4.31575	3.72117
Stuttgart	Car	SPEED	middle	34686174	0.661659	6.96965	4.99222	1.35574
Stuttgart	Car	SPEED	small	76126311	0.590749	8.36293	5.9551	2.61759
Stuttgart	Truck	COUNT	major	42875112	0.711746	2.25079	1.36766	1.32543
Stuttgart	Truck	COUNT	middle	9069984	0.575644	1.38618	0.941054	0.258289
Stuttgart	Truck	COUNT	small	10411686	0.592589	1.65698	0.982425	0.274707
Stuttgart	Truck	SPEED	major	42875112	0.799307	8.73704	6.41241	1.58477
Stuttgart	Truck	SPEED	middle	9069984	0.566837	7.8912	5.95469	0.326331
Stuttgart	Truck	SPEED	small	10411686	0.564048	7.85784	5.66308	0.347899
Düsseldorf	Car	COUNT	major	98466993	0.941331	14.5829	8.69392	3.33232
Düsseldorf	Car	COUNT	middle	29235987	0.804103	7.99505	4.88919	0.979025
Düsseldorf	Car	COUNT	small	68554286	0.702078	5.20705	2.88866	1.8691
Düsseldorf	Car	SPEED	major	98466993	0.927692	6.30683	4.31401	3.30537
Düsseldorf	Car	SPEED	middle	29235987	0.667155	6.52138	4.64269	1.13504
Düsseldorf	Car	SPEED	small	68554286	0.598434	8.40225	5.67378	2.22105
Düsseldorf	Truck	COUNT	major	47482144	0.682465	2.44889	1.55329	1.35768
Düsseldorf	Truck	COUNT	middle	10230943	0.419073	1.66524	1.15435	0.338346
Düsseldorf	Truck	COUNT	small	11120924	0.53386	1.89261	1.14132	0.318026
Düsseldorf	Truck	SPEED	major	47482144	0.863176	9.67078	7.10198	1.63045
Düsseldorf	Truck	SPEED	middle	10230943	0.477586	8.41888	6.35315	0.367352
Düsseldorf	Truck	SPEED	small	11120924	0.556557	7.94521	5.73094	0.373683
Rotterdam	Car	COUNT	major	70931843	0.959831	37.8815	18.8362	2.8191
Rotterdam	Car	COUNT	middle	82951565	0.84483	9.07886	5.37055	3.71111
Rotterdam	Car	COUNT	small	161331991	0.799119	6.10916	3.04994	5.57945
Rotterdam	Car	SPEED	major	70931843	0.940776	6.7289	4.29162	3.07384
Rotterdam	Car	SPEED	middle	82951565	0.769562	6.16597	4.25612	3.70619
Rotterdam	Car	SPEED	small	161331991	0.728148	7.85007	5.53501	6.82886
Rotterdam	Truck	COUNT	major	42869645	0.809587	2.99131	1.80884	1.77862
Rotterdam	Truck	COUNT	middle	33120081	0.567032	1.42389	0.975039	1.24846
Rotterdam	Truck	COUNT	small	29433255	0.664463	1.83317	1.06001	0.922942
Rotterdam	Truck	SPEED	major	42869645	0.889263	9.92561	7.14989	2.01286
Rotterdam	Truck	SPEED	middle	33120081	0.57318	8.36582	6.24719	1.48199
Rotterdam	Truck	SPEED	small	29433255	0.768867	8.10603	5.85109	1.2448
The Hague	Car	COUNT	major	25493076	0.966819	33.5842	17.1435	0.656509
The Hague	Car	COUNT	middle	48963448	0.849203	9.01	5.72174	1.26551
The Hague	Car	COUNT	small	127847337	0.774323	4.4721	2.63954	2.64634
The Hague	Car	SPEED	major	25493076	0.95396	5.60323	3.62864	0.714067
The Hague	Car	SPEED	middle	48963448	0.780272	5.62094	3.94857	1.4453
The Hague	Car	SPEED	small	127847337	0.635678	7.48101	5.32721	3.19926
The Hague	Truck	COUNT	major	15900198	0.714127	2.65448	1.74019	0.423417
The Hague	Truck	COUNT	middle	23448191	0.389531	1.51469	1.07876	0.592255
The Hague	Truck	COUNT	small	24790393	0.372234	1.22252	0.850527	0.545599
The Hague	Truck	SPEED	major	15900198	0.905675	8.83009	6.41522	0.466329
The Hague	Truck	SPEED	middle	23448191	0.509681	8.45308	6.40582	0.664351
The Hague	Truck	SPEED	small	24790393	0.540364	8.10892	5.96821	0.715291

## Sheet: Table S3
Table S3 The parameters of the fitting results of emission factors
city	Category	Fuel	Segment	a	b	c	d	r2
Paris	L-Category	Diesel	Micro-car	0	0	0	106.706
Paris	L-Category	Petrol	All	-8.90547e-05	0.0294751	-2.63265	163.386	0.989787
Paris	Buses	Diesel	All	-0.0160877	4.17019	-270.742	5394.03	0.881887
Paris	Buses	CNG	Urban CNG Buses	-0.000231141	0.0725103	-7.37042	1448.05	0.994349
Paris	Buses	Diesel Hybrid	Urban Buses Diesel Hybrid	-0.0020965	0.532537	-35.9408	1225.49	0.900569
Paris	Buses	Biodiesel	Urban Biodiesel Buses	-0.000863716	0.266708	-26.4416	1413.56	0.995207
Paris	Buses	Battery electric	All	0	0	0	0
Paris	Buses	Diesel PHEV	All	-0.0020965	0.532537	-35.9408	1225.49	0.900569
Paris	Buses	Petrol	All	-0.000655505	0.18829	-16.7771	921.955	0.971085
Paris	Heavy Duty Trucks	Petrol	>3,5 t	-0.000655505	0.18829	-16.7771	921.955	0.971085
Paris	Heavy Duty Trucks	Diesel	All	-0.00102969	0.320987	-32.3502	1673.8	0.993594
Paris	Heavy Duty Trucks	Diesel PHEV	All	-0.0020965	0.532537	-35.9408	1225.49	0.900569
Paris	Heavy Duty Trucks	Battery electric	All	0	0	0	0
Paris	Heavy Duty Trucks	CNG	All	-0.000231141	0.0725103	-7.37042	1448.05	0.994349
Paris	Light Commercial Vehicles	Diesel	All	-0.000468374	0.135019	-11.0786	477.57	0.979367
Paris	Light Commercial Vehicles	Petrol	All	-0.000345641	0.119785	-11.9512	580.539	0.991953
Paris	Light Commercial Vehicles	Diesel PHEV	All	-0.000179653	0.0720357	-6.70456	292.056	0.990595
Paris	Light Commercial Vehicles	Battery electric	All	0	0	0	0
Paris	Light Commercial Vehicles	CNG	All	-0.000200385	0.0677146	-6.77272	348.325	0.997288
Paris	Light Commercial Vehicles	Petrol Hybrid	All	-9.34041e-05	0.035748	-3.20923	221.014	0.995804
Paris	Light Commercial Vehicles	Petrol PHEV	All	-0.000192689	0.0772895	-7.19825	315.956	0.990579
Paris	Passenger Cars	Petrol	Mini	-0.000263835	0.0799751	-6.89713	321.471	0.990808
Paris	Passenger Cars	Petrol	Small	-0.000281145	0.0941438	-8.78207	415.309	0.997024
Paris	Passenger Cars	Petrol	Medium	-0.000346641	0.115441	-10.8438	505.378	0.997647
Paris	Passenger Cars	Petrol	Large-SUV-Executive	-0.000461388	0.15126	-14.8008	689.625	0.995034
Paris	Passenger Cars	Diesel	Mini	-0.00016488	0.0472935	-3.74995	200.901	0.977803
Paris	Passenger Cars	Diesel	Small	-0.000148008	0.0570006	-5.85378	334.245	0.996531
Paris	Passenger Cars	Diesel	Medium	-0.000148008	0.0570006	-5.85378	334.245	0.996531
Paris	Passenger Cars	Diesel	Large-SUV-Executive	-0.000254391	0.0887577	-8.54337	450.486	0.996781
Paris	Passenger Cars	CNG Bifuel	Mini	-0.000200385	0.0677146	-6.77272	348.325	0.997288
Paris	Passenger Cars	CNG Bifuel	Small	-0.000200385	0.0677146	-6.77272	348.325	0.997288
Paris	Passenger Cars	CNG Bifuel	Medium	-0.000200385	0.0677146	-6.77272	348.325	0.997288
Paris	Passenger Cars	CNG Bifuel	Large-SUV-Executive	-0.000200385	0.0677146	-6.77272	348.325	0.997288
Paris	Passenger Cars	Petrol Hybrid	Mini	-8.65583e-05	0.0314858	-2.63222	187.049	0.995683
Paris	Passenger Cars	Petrol Hybrid	Small	-8.65583e-05	0.0314858	-2.63222	187.049	0.995683
Paris	Passenger Cars	Petrol Hybrid	Medium	-9.00558e-05	0.0333447	-2.88705	200.976	0.995685
Paris	Passenger Cars	Petrol Hybrid	Large-SUV-Executive	-9.34041e-05	0.035748	-3.20923	221.014	0.995804
Paris	Passenger Cars	Petrol PHEV	Small	-0.000135791	0.0544718	-5.07398	230.269	0.990575
Paris	Passenger Cars	Petrol PHEV	Medium	-0.000163573	0.0657224	-6.14068	268.954	0.990503
Paris	Passenger Cars	Petrol PHEV	Large-SUV-Executive	-0.000192689	0.0772895	-7.19825	315.956	0.990579
Paris	Passenger Cars	Battery electric	Small	0	0	0	0
Paris	Passenger Cars	Battery electric	Medium	0	0	0	0
Paris	Passenger Cars	Battery electric	Large-SUV-Executive	0	0	0	0
Paris	Passenger Cars	Diesel PHEV	Large-SUV-Executive	-0.000179653	0.0720357	-6.70456	292.056	0.990595
Berlin	L-Category	Diesel	Micro-car	0	0	0	107.993
Berlin	L-Category	Petrol	All	-8.90547e-05	0.0294751	-2.63265	163.386	0.989787
Berlin	Buses	Diesel	All	-0.0160877	4.17019	-270.742	5394.03	0.881887
Berlin	Buses	CNG	Urban CNG Buses	-0.000231141	0.0725103	-7.37042	1448.05	0.994349
Berlin	Buses	Diesel Hybrid	Urban Buses Diesel Hybrid	-0.0020965	0.532537	-35.9408	1225.49	0.900569
Berlin	Buses	Biodiesel	Urban Biodiesel Buses	-0.000863716	0.266708	-26.4416	1413.56	0.995207
Berlin	Buses	Battery electric	All	0	0	0	0
Berlin	Buses	Diesel PHEV	All	-0.0020965	0.532537	-35.9408	1225.49	0.900569
Berlin	Buses	Petrol	All	-0.000655505	0.18829	-16.7771	921.955	0.971085
Berlin	Heavy Duty Trucks	Petrol	>3,5 t	-0.000655505	0.18829	-16.7771	921.955	0.971085
Berlin	Heavy Duty Trucks	Diesel	All	-0.00102969	0.320987	-32.3502	1673.8	0.993594
Berlin	Heavy Duty Trucks	Diesel PHEV	All	-0.0020965	0.532537	-35.9408	1225.49	0.900569
Berlin	Heavy Duty Trucks	Battery electric	All	0	0	0	0
Berlin	Heavy Duty Trucks	CNG	All	-0.000231141	0.0725103	-7.37042	1448.05	0.994349
Berlin	Light Commercial Vehicles	Diesel	All	-0.000482761	0.13837	-11.3091	484.768	0.977179
Berlin	Light Commercial Vehicles	Petrol	All	-0.000351704	0.121835	-12.1529	590.058	0.991796
Berlin	Light Commercial Vehicles	Diesel PHEV	All	-0.000181819	0.0729045	-6.78541	295.578	0.990595
Berlin	Light Commercial Vehicles	Battery electric	All	0	0	0	0
Berlin	Light Commercial Vehicles	CNG	All	-0.000202692	0.0685882	-6.8635	353.209	0.997259
Berlin	Light Commercial Vehicles	Petrol Hybrid	All	-9.66068e-05	0.0370585	-3.35164	228.909	0.995875
Berlin	Light Commercial Vehicles	Petrol PHEV	All	-0.000195425	0.0783868	-7.30045	320.442	0.990579
Berlin	Passenger Cars	Petrol	Mini	-0.000266448	0.0809185	-6.98986	326.441	0.990904
Berlin	Passenger Cars	Petrol	Small	-0.000284557	0.0953504	-8.89706	420.941	0.997022
Berlin	Passenger Cars	Petrol	Medium	-0.000351295	0.117051	-10.9979	512.545	0.997643
Berlin	Passenger Cars	Petrol	Large-SUV-Executive	-0.000467205	0.15325	-14.9964	698.831	0.995041
Berlin	Passenger Cars	Diesel	Mini	-0.000166868	0.0478639	-3.79517	203.324	0.977803
Berlin	Passenger Cars	Diesel	Small	-0.000149793	0.057688	-5.92438	338.276	0.996531
Berlin	Passenger Cars	Diesel	Medium	-0.000149793	0.057688	-5.92438	338.276	0.996531
Berlin	Passenger Cars	Diesel	Large-SUV-Executive	-0.000257459	0.0898281	-8.64641	455.919	0.996781
Berlin	Passenger Cars	CNG Bifuel	Mini	-0.000202692	0.0685882	-6.8635	353.209	0.997259
Berlin	Passenger Cars	CNG Bifuel	Small	-0.000202692	0.0685882	-6.8635	353.209	0.997259
Berlin	Passenger Cars	CNG Bifuel	Medium	-0.000202692	0.0685882	-6.8635	353.209	0.997259
Berlin	Passenger Cars	CNG Bifuel	Large-SUV-Executive	-0.000202692	0.0685882	-6.8635	353.209	0.997259
Berlin	Passenger Cars	Petrol Hybrid	Mini	-8.91715e-05	0.0324292	-2.72494	192.019	0.995749
Berlin	Passenger Cars	Petrol Hybrid	Small	-8.91715e-05	0.0324292	-2.72494	192.019	0.995749
Berlin	Passenger Cars	Petrol Hybrid	Medium	-9.29702e-05	0.0344482	-3.00172	207.146	0.995753
Berlin	Passenger Cars	Petrol Hybrid	Large-SUV-Executive	-9.66068e-05	0.0370585	-3.35164	228.909	0.995875
Berlin	Passenger Cars	Petrol PHEV	Small	-0.000137719	0.0552452	-5.14602	233.538	0.990575
Berlin	Passenger Cars	Petrol PHEV	Medium	-0.000165896	0.0666555	-6.22786	272.772	0.990503
Berlin	Passenger Cars	Petrol PHEV	Large-SUV-Executive	-0.000195425	0.0783868	-7.30045	320.442	0.990579
Berlin	Passenger Cars	Battery electric	Small	0	0	0	0
Berlin	Passenger Cars	Battery electric	Medium	0	0	0	0
Berlin	Passenger Cars	Battery electric	Large-SUV-Executive	0	0	0	0
Berlin	Passenger Cars	Diesel PHEV	Large-SUV-Executive	-0.000181819	0.0729045	-6.78541	295.578	0.990595
Lyon	L-Category	Diesel	Micro-car	0	0	0	106.081
Lyon	L-Category	Petrol	All	-8.90547e-05	0.0294751	-2.63265	163.386	0.989787
Lyon	Buses	Diesel	All	-0.0160877	4.17019	-270.742	5394.03	0.881887
Lyon	Buses	CNG	Urban CNG Buses	-0.000231141	0.0725103	-7.37042	1448.05	0.994349
Lyon	Buses	Diesel Hybrid	Urban Buses Diesel Hybrid	-0.0020965	0.532537	-35.9408	1225.49	0.900569
Lyon	Buses	Biodiesel	Urban Biodiesel Buses	-0.000863716	0.266708	-26.4416	1413.56	0.995207
Lyon	Buses	Battery electric	All	0	0	0	0
Lyon	Buses	Diesel PHEV	All	-0.0020965	0.532537	-35.9408	1225.49	0.900569
Lyon	Buses	Petrol	All	-0.000655505	0.18829	-16.7771	921.955	0.971085
Lyon	Heavy Duty Trucks	Petrol	>3,5 t	-0.000655505	0.18829	-16.7771	921.955	0.971085
Lyon	Heavy Duty Trucks	Diesel	All	-0.00102969	0.320987	-32.3502	1673.8	0.993594
Lyon	Heavy Duty Trucks	Diesel PHEV	All	-0.0020965	0.532537	-35.9408	1225.49	0.900569
Lyon	Heavy Duty Trucks	Battery electric	All	0	0	0	0
Lyon	Heavy Duty Trucks	CNG	All	-0.000231141	0.0725103	-7.37042	1448.05	0.994349
Lyon	Light Commercial Vehicles	Diesel	All	-0.000461386	0.133392	-10.9667	474.075	0.980402
Lyon	Light Commercial Vehicles	Petrol	All	-0.000342615	0.118762	-11.8505	575.787	0.992033
Lyon	Light Commercial Vehicles	Diesel PHEV	All	-0.0001786	0.0716137	-6.66528	290.345	0.990595
Lyon	Light Commercial Vehicles	Battery electric	All	0	0	0	0
Lyon	Light Commercial Vehicles	CNG	All	-0.000199233	0.0672786	-6.7274	345.887	0.997303
Lyon	Light Commercial Vehicles	Petrol Hybrid	All	-9.18056e-05	0.035094	-3.13814	217.073	0.995767
Lyon	Light Commercial Vehicles	Petrol PHEV	All	-0.000191323	0.0767417	-7.14724	313.717	0.990579
Lyon	Passenger Cars	Petrol	Mini	-0.00026253	0.0795042	-6.85085	318.991	0.990758
Lyon	Passenger Cars	Petrol	Small	-0.000279441	0.0935416	-8.72467	412.498	0.997025
Lyon	Passenger Cars	Petrol	Medium	-0.000344317	0.114638	-10.7669	501.8	0.997648
Lyon	Passenger Cars	Petrol	Large-SUV-Executive	-0.000458485	0.150268	-14.7032	685.03	0.995031
Lyon	Passenger Cars	Diesel	Mini	-0.000163914	0.0470165	-3.72798	199.724	0.977803
Lyon	Passenger Cars	Diesel	Small	-0.000147141	0.0566667	-5.81949	332.287	0.996531
Lyon	Passenger Cars	Diesel	Medium	-0.000147141	0.0566667	-5.81949	332.287	0.996531
Lyon	Passenger Cars	Diesel	Large-SUV-Executive	-0.000252901	0.0882378	-8.49333	447.847	0.996781
Lyon	Passenger Cars	CNG Bifuel	Mini	-0.000199233	0.0672786	-6.7274	345.887	0.997303
Lyon	Passenger Cars	CNG Bifuel	Small	-0.000199233	0.0672786	-6.7274	345.887	0.997303
Lyon	Passenger Cars	CNG Bifuel	Medium	-0.000199233	0.0672786	-6.7274	345.887	0.997303
Lyon	Passenger Cars	CNG Bifuel	Large-SUV-Executive	-0.000199233	0.0672786	-6.7274	345.887	0.997303
Lyon	Passenger Cars	Petrol Hybrid	Mini	-8.5254e-05	0.0310149	-2.58593	184.569	0.995648
Lyon	Passenger Cars	Petrol Hybrid	Small	-8.5254e-05	0.0310149	-2.58593	184.569	0.995648
Lyon	Passenger Cars	Petrol Hybrid	Medium	-8.86012e-05	0.0327939	-2.82981	197.897	0.995649
Lyon	Passenger Cars	Petrol Hybrid	Large-SUV-Executive	-9.18056e-05	0.035094	-3.13814	217.073	0.995767
Lyon	Passenger Cars	Petrol PHEV	Small	-0.000134829	0.0540858	-5.03802	228.637	0.990575
Lyon	Passenger Cars	Petrol PHEV	Medium	-0.000162414	0.0652566	-6.09716	267.048	0.990503
Lyon	Passenger Cars	Petrol PHEV	Large-SUV-Executive	-0.000191323	0.0767417	-7.14724	313.717	0.990579
Lyon	Passenger Cars	Battery electric	Small	0	0	0	0
Lyon	Passenger Cars	Battery electric	Medium	0	0	0	0
Lyon	Passenger Cars	Battery electric	Large-SUV-Executive	0	0	0	0
Lyon	Passenger Cars	Diesel PHEV	Large-SUV-Executive	-0.0001786	0.0716137	-6.66528	290.345	0.990595
Toulouse	L-Category	Diesel	Micro-car	0	0	0	104.964
Toulouse	L-Category	Petrol	All	-8.90547e-05	0.0294751	-2.63265	163.386	0.989787
Toulouse	Buses	Diesel	All	-0.0160877	4.17019	-270.742	5394.03	0.881887
Toulouse	Buses	CNG	Urban CNG Buses	-0.000231141	0.0725103	-7.37042	1448.05	0.994349
Toulouse	Buses	Diesel Hybrid	Urban Buses Diesel Hybrid	-0.0020965	0.532537	-35.9408	1225.49	0.900569
Toulouse	Buses	Biodiesel	Urban Biodiesel Buses	-0.000863716	0.266708	-26.4416	1413.56	0.995207
Toulouse	Buses	Battery electric	All	0	0	0	0
Toulouse	Buses	Diesel PHEV	All	-0.0020965	0.532537	-35.9408	1225.49	0.900569
Toulouse	Buses	Petrol	All	-0.000655505	0.18829	-16.7771	921.955	0.971085
Toulouse	Heavy Duty Trucks	Petrol	>3,5 t	-0.000655505	0.18829	-16.7771	921.955	0.971085
Toulouse	Heavy Duty Trucks	Diesel	All	-0.00102969	0.320987	-32.3502	1673.8	0.993594
Toulouse	Heavy Duty Trucks	Diesel PHEV	All	-0.0020965	0.532537	-35.9408	1225.49	0.900569
Toulouse	Heavy Duty Trucks	Battery electric	All	0	0	0	0
Toulouse	Heavy Duty Trucks	CNG	All	-0.000231141	0.0725103	-7.37042	1448.05	0.994349
Toulouse	Light Commercial Vehicles	Diesel	All	-0.000448903	0.130484	-10.7667	467.83	0.982203
Toulouse	Light Commercial Vehicles	Petrol	All	-0.000337301	0.116966	-11.6737	567.444	0.992175
Toulouse	Light Commercial Vehicles	Diesel PHEV	All	-0.000176721	0.07086	-6.59513	287.289	0.990595
Toulouse	Light Commercial Vehicles	Battery electric	All	0	0	0	0
Toulouse	Light Commercial Vehicles	CNG	All	-0.000197211	0.066513	-6.64784	341.606	0.997329
Toulouse	Light Commercial Vehicles	Petrol Hybrid	All	-8.89987e-05	0.0339455	-3.01332	210.154	0.995698
Toulouse	Light Commercial Vehicles	Petrol PHEV	All	-0.000188926	0.07578	-7.05767	309.785	0.990579
Toulouse	Passenger Cars	Petrol	Mini	-0.00026024	0.0786774	-6.76958	314.635	0.990668
Toulouse	Passenger Cars	Petrol	Small	-0.000276451	0.092484	-8.62389	407.561	0.997027
Toulouse	Passenger Cars	Petrol	Medium	-0.000340238	0.113226	-10.6319	495.519	0.997651
Toulouse	Passenger Cars	Petrol	Large-SUV-Executive	-0.000453388	0.148524	-14.5317	676.962	0.995025
Toulouse	Passenger Cars	Diesel	Mini	-0.000162189	0.0465216	-3.68874	197.622	0.977803
Toulouse	Passenger Cars	Diesel	Small	-0.000145592	0.0560703	-5.75824	328.79	0.996531
Toulouse	Passenger Cars	Diesel	Medium	-0.000145592	0.0560703	-5.75824	328.79	0.996531
Toulouse	Passenger Cars	Diesel	Large-SUV-Executive	-0.000250239	0.0873091	-8.40394	443.134	0.996781
Toulouse	Passenger Cars	CNG Bifuel	Mini	-0.000197211	0.066513	-6.64784	341.606	0.997329
Toulouse	Passenger Cars	CNG Bifuel	Small	-0.000197211	0.066513	-6.64784	341.606	0.997329
Toulouse	Passenger Cars	CNG Bifuel	Medium	-0.000197211	0.066513	-6.64784	341.606	0.997329
Toulouse	Passenger Cars	CNG Bifuel	Large-SUV-Executive	-0.000197211	0.066513	-6.64784	341.606	0.997329
Toulouse	Passenger Cars	Petrol Hybrid	Mini	-8.29638e-05	0.0301881	-2.50466	180.213	0.995584
Toulouse	Passenger Cars	Petrol Hybrid	Small	-8.29638e-05	0.0301881	-2.50466	180.213	0.995584
Toulouse	Passenger Cars	Petrol Hybrid	Medium	-8.6047e-05	0.0318268	-2.72931	192.49	0.995583
Toulouse	Passenger Cars	Petrol Hybrid	Large-SUV-Executive	-8.89987e-05	0.0339455	-3.01332	210.154	0.995698
Toulouse	Passenger Cars	Petrol PHEV	Small	-0.000133139	0.0534079	-4.97488	225.771	0.990575
Toulouse	Passenger Cars	Petrol PHEV	Medium	-0.000160379	0.0644388	-6.02075	263.701	0.990503
Toulouse	Passenger Cars	Petrol PHEV	Large-SUV-Executive	-0.000188926	0.07578	-7.05767	309.785	0.990579
Toulouse	Passenger Cars	Battery electric	Small	0	0	0	0
Toulouse	Passenger Cars	Battery electric	Medium	0	0	0	0
Toulouse	Passenger Cars	Battery electric	Large-SUV-Executive	0	0	0	0
Toulouse	Passenger Cars	Diesel PHEV	Large-SUV-Executive	-0.000176721	0.07086	-6.59513	287.289	0.990595
Marseille	L-Category	Diesel	Micro-car	0	0	0	104.775
Marseille	L-Category	Petrol	All	-8.90547e-05	0.0294751	-2.63265	163.386	0.989787
Marseille	Buses	Diesel	All	-0.0160877	4.17019	-270.742	5394.03	0.881887
Marseille	Buses	CNG	Urban CNG Buses	-0.000231141	0.0725103	-7.37042	1448.05	0.994349
Marseille	Buses	Diesel Hybrid	Urban Buses Diesel Hybrid	-0.0020965	0.532537	-35.9408	1225.49	0.900569
Marseille	Buses	Biodiesel	Urban Biodiesel Buses	-0.000863716	0.266708	-26.4416	1413.56	0.995207
Marseille	Buses	Battery electric	All	0	0	0	0
Marseille	Buses	Diesel PHEV	All	-0.0020965	0.532537	-35.9408	1225.49	0.900569
Marseille	Buses	Petrol	All	-0.000655505	0.18829	-16.7771	921.955	0.971085
Marseille	Heavy Duty Trucks	Petrol	>3,5 t	-0.000655505	0.18829	-16.7771	921.955	0.971085
Marseille	Heavy Duty Trucks	Diesel	All	-0.00102969	0.320987	-32.3502	1673.8	0.993594
Marseille	Heavy Duty Trucks	Diesel PHEV	All	-0.0020965	0.532537	-35.9408	1225.49	0.900569
Marseille	Heavy Duty Trucks	Battery electric	All	0	0	0	0
Marseille	Heavy Duty Trucks	CNG	All	-0.000231141	0.0725103	-7.37042	1448.05	0.994349
Marseille	Light Commercial Vehicles	Diesel	All	-0.000446781	0.12999	-10.7327	466.768	0.982503
Marseille	Light Commercial Vehicles	Petrol	All	-0.000336422	0.116669	-11.6444	566.064	0.992198
Marseille	Light Commercial Vehicles	Diesel PHEV	All	-0.000176401	0.0707318	-6.5832	286.77	0.990595
Marseille	Light Commercial Vehicles	Battery electric	All	0	0	0	0
Marseille	Light Commercial Vehicles	CNG	All	-0.000196877	0.0663864	-6.63468	340.898	0.997333
Marseille	Light Commercial Vehicles	Petrol Hybrid	All	-8.85345e-05	0.0337556	-2.99268	209.01	0.995686
Marseille	Light Commercial Vehicles	Petrol PHEV	All	-0.000188529	0.0756209	-7.04286	309.135	0.990579
Marseille	Passenger Cars	Petrol	Mini	-0.000259861	0.0785407	-6.75614	313.915	0.990652
Marseille	Passenger Cars	Petrol	Small	-0.000275956	0.0923092	-8.60723	406.745	0.997027
Marseille	Passenger Cars	Petrol	Medium	-0.000339563	0.112993	-10.6095	494.48	0.997652
Marseille	Passenger Cars	Petrol	Large-SUV-Executive	-0.000452545	0.148236	-14.5034	675.628	0.995024
Marseille	Passenger Cars	Diesel	Mini	-0.000161895	0.0464375	-3.68207	197.265	0.977803
Marseille	Passenger Cars	Diesel	Small	-0.000145329	0.0559689	-5.74783	328.195	0.996531
Marseille	Passenger Cars	Diesel	Medium	-0.000145329	0.0559689	-5.74783	328.195	0.996531
Marseille	Passenger Cars	Diesel	Large-SUV-Executive	-0.000249787	0.0871512	-8.38874	442.332	0.996781
Marseille	Passenger Cars	CNG Bifuel	Mini	-0.000196877	0.0663864	-6.63468	340.898	0.997333
Marseille	Passenger Cars	CNG Bifuel	Small	-0.000196877	0.0663864	-6.63468	340.898	0.997333
Marseille	Passenger Cars	CNG Bifuel	Medium	-0.000196877	0.0663864	-6.63468	340.898	0.997333
Marseille	Passenger Cars	CNG Bifuel	Large-SUV-Executive	-0.000196877	0.0663864	-6.63468	340.898	0.997333
Marseille	Passenger Cars	Petrol Hybrid	Mini	-8.2585e-05	0.0300514	-2.49122	179.492	0.995573
Marseille	Passenger Cars	Petrol Hybrid	Small	-8.2585e-05	0.0300514	-2.49122	179.492	0.995573
Marseille	Passenger Cars	Petrol Hybrid	Medium	-8.56246e-05	0.0316669	-2.71269	191.596	0.995572
Marseille	Passenger Cars	Petrol Hybrid	Large-SUV-Executive	-8.85345e-05	0.0337556	-2.99268	209.01	0.995686
Marseille	Passenger Cars	Petrol PHEV	Small	-0.00013286	0.0532959	-4.96444	225.297	0.990575
Marseille	Passenger Cars	Petrol PHEV	Medium	-0.000160042	0.0643036	-6.00811	263.147	0.990503
Marseille	Passenger Cars	Petrol PHEV	Large-SUV-Executive	-0.000188529	0.0756209	-7.04286	309.135	0.990579
Marseille	Passenger Cars	Battery electric	Small	0	0	0	0
Marseille	Passenger Cars	Battery electric	Medium	0	0	0	0
Marseille	Passenger Cars	Battery electric	Large-SUV-Executive	0	0	0	0
Marseille	Passenger Cars	Diesel PHEV	Large-SUV-Executive	-0.000176401	0.0707318	-6.5832	286.77	0.990595
Lille	L-Category	Diesel	Micro-car	0	0	0	107.332
Lille	L-Category	Petrol	All	-8.90547e-05	0.0294751	-2.63265	163.386	0.989787
Lille	Buses	Diesel	All	-0.0160877	4.17019	-270.742	5394.03	0.881887
Lille	Buses	CNG	Urban CNG Buses	-0.000231141	0.0725103	-7.37042	1448.05	0.994349
Lille	Buses	Diesel Hybrid	Urban Buses Diesel Hybrid	-0.0020965	0.532537	-35.9408	1225.49	0.900569
Lille	Buses	Biodiesel	Urban Biodiesel Buses	-0.000863716	0.266708	-26.4416	1413.56	0.995207
Lille	Buses	Battery electric	All	0	0	0	0
Lille	Buses	Diesel PHEV	All	-0.0020965	0.532537	-35.9408	1225.49	0.900569
Lille	Buses	Petrol	All	-0.000655505	0.18829	-16.7771	921.955	0.971085
Lille	Heavy Duty Trucks	Petrol	>3,5 t	-0.000655505	0.18829	-16.7771	921.955	0.971085
Lille	Heavy Duty Trucks	Diesel	All	-0.00102969	0.320987	-32.3502	1673.8	0.993594
Lille	Heavy Duty Trucks	Diesel PHEV	All	-0.0020965	0.532537	-35.9408	1225.49	0.900569
Lille	Heavy Duty Trucks	Battery electric	All	0	0	0	0
Lille	Heavy Duty Trucks	CNG	All	-0.000231141	0.0725103	-7.37042	1448.05	0.994349
Lille	Light Commercial Vehicles	Diesel	All	-0.000475376	0.13665	-11.1908	481.074	0.978311
Lille	Light Commercial Vehicles	Petrol	All	-0.000348626	0.120794	-12.0505	585.225	0.991875
Lille	Light Commercial Vehicles	Diesel PHEV	All	-0.000180707	0.0724585	-6.74391	293.77	0.990595
Lille	Light Commercial Vehicles	Battery electric	All	0	0	0	0
Lille	Light Commercial Vehicles	CNG	All	-0.000201521	0.0681447	-6.81741	350.729	0.997274
Lille	Light Commercial Vehicles	Petrol Hybrid	All	-9.49807e-05	0.0363931	-3.27933	224.9	0.99584
Lille	Light Commercial Vehicles	Petrol PHEV	All	-0.000194036	0.0778296	-7.24856	318.164	0.990579
Lille	Passenger Cars	Petrol	Mini	-0.000265121	0.0804395	-6.94278	323.918	0.990856
Lille	Passenger Cars	Petrol	Small	-0.000282824	0.0947378	-8.83867	418.081	0.997023
Lille	Passenger Cars	Petrol	Medium	-0.000348932	0.116234	-10.9197	508.906	0.997645
Lille	Passenger Cars	Petrol	Large-SUV-Executive	-0.000464252	0.15224	-14.8971	694.156	0.995037
Lille	Passenger Cars	Diesel	Mini	-0.000165847	0.0475711	-3.77196	202.08	0.977803
Lille	Passenger Cars	Diesel	Small	-0.000148877	0.0573352	-5.88814	336.207	0.996531
Lille	Passenger Cars	Diesel	Medium	-0.000148877	0.0573352	-5.88814	336.207	0.996531
Lille	Passenger Cars	Diesel	Large-SUV-Executive	-0.000255884	0.0892787	-8.59352	453.13	0.996781
Lille	Passenger Cars	CNG Bifuel	Mini	-0.000201521	0.0681447	-6.81741	350.729	0.997274
Lille	Passenger Cars	CNG Bifuel	Small	-0.000201521	0.0681447	-6.81741	350.729	0.997274
Lille	Passenger Cars	CNG Bifuel	Medium	-0.000201521	0.0681447	-6.81741	350.729	0.997274
Lille	Passenger Cars	CNG Bifuel	Large-SUV-Executive	-0.000201521	0.0681447	-6.81741	350.729	0.997274
Lille	Passenger Cars	Petrol Hybrid	Mini	-8.78447e-05	0.0319502	-2.67786	189.496	0.995716
Lille	Passenger Cars	Petrol Hybrid	Small	-8.78447e-05	0.0319502	-2.67786	189.496	0.995716
Lille	Passenger Cars	Petrol Hybrid	Medium	-9.14904e-05	0.0338879	-2.9435	204.013	0.995719
Lille	Passenger Cars	Petrol Hybrid	Large-SUV-Executive	-9.49807e-05	0.0363931	-3.27933	224.9	0.99584
Lille	Passenger Cars	Petrol PHEV	Small	-0.00013674	0.0548525	-5.10944	231.878	0.990575
Lille	Passenger Cars	Petrol PHEV	Medium	-0.000164717	0.0661817	-6.1836	270.833	0.990503
Lille	Passenger Cars	Petrol PHEV	Large-SUV-Executive	-0.000194036	0.0778296	-7.24856	318.164	0.990579
Lille	Passenger Cars	Battery electric	Small	0	0	0	0
Lille	Passenger Cars	Battery electric	Medium	0	0	0	0
Lille	Passenger Cars	Battery electric	Large-SUV-Executive	0	0	0	0
Lille	Passenger Cars	Diesel PHEV	Large-SUV-Executive	-0.000180707	0.0724585	-6.74391	293.77	0.990595
Nice	L-Category	Diesel	Micro-car	0	0	0	105.056
Nice	L-Category	Petrol	All	-8.90547e-05	0.0294751	-2.63265	163.386	0.989787
Nice	Buses	Diesel	All	-0.0160877	4.17019	-270.742	5394.03	0.881887
Nice	Buses	CNG	Urban CNG Buses	-0.000231141	0.0725103	-7.37042	1448.05	0.994349
Nice	Buses	Diesel Hybrid	Urban Buses Diesel Hybrid	-0.0020965	0.532537	-35.9408	1225.49	0.900569
Nice	Buses	Biodiesel	Urban Biodiesel Buses	-0.000863716	0.266708	-26.4416	1413.56	0.995207
Nice	Buses	Battery electric	All	0	0	0	0
Nice	Buses	Diesel PHEV	All	-0.0020965	0.532537	-35.9408	1225.49	0.900569
Nice	Buses	Petrol	All	-0.000655505	0.18829	-16.7771	921.955	0.971085
Nice	Heavy Duty Trucks	Petrol	>3,5 t	-0.000655505	0.18829	-16.7771	921.955	0.971085
Nice	Heavy Duty Trucks	Diesel	All	-0.00102969	0.320987	-32.3502	1673.8	0.993594
Nice	Heavy Duty Trucks	Diesel PHEV	All	-0.0020965	0.532537	-35.9408	1225.49	0.900569
Nice	Heavy Duty Trucks	Battery electric	All	0	0	0	0
Nice	Heavy Duty Trucks	CNG	All	-0.000231141	0.0725103	-7.37042	1448.05	0.994349
Nice	Light Commercial Vehicles	Diesel	All	-0.000449931	0.130724	-10.7831	468.344	0.982057
Nice	Light Commercial Vehicles	Petrol	All	-0.000337804	0.117136	-11.6904	568.234	0.992161
Nice	Light Commercial Vehicles	Diesel PHEV	All	-0.000176875	0.070922	-6.60091	287.541	0.990595
Nice	Light Commercial Vehicles	Battery electric	All	0	0	0	0
Nice	Light Commercial Vehicles	CNG	All	-0.000197403	0.0665855	-6.65537	342.012	0.997327
Nice	Light Commercial Vehicles	Petrol Hybrid	All	-8.92645e-05	0.0340542	-3.02514	210.809	0.995704
Nice	Light Commercial Vehicles	Petrol PHEV	All	-0.000189153	0.0758711	-7.06615	310.158	0.990579
Nice	Passenger Cars	Petrol	Mini	-0.000260457	0.0787557	-6.77727	315.047	0.990676
Nice	Passenger Cars	Petrol	Small	-0.000276734	0.0925842	-8.63344	408.029	0.997027
Nice	Passenger Cars	Petrol	Medium	-0.000340624	0.11336	-10.6447	496.114	0.997651
Nice	Passenger Cars	Petrol	Large-SUV-Executive	-0.00045387	0.148689	-14.548	677.726	0.995025
Nice	Passenger Cars	Diesel	Mini	-0.000162331	0.0465624	-3.69197	197.795	0.977803
Nice	Passenger Cars	Diesel	Small	-0.00014572	0.0561194	-5.76328	329.078	0.996531
Nice	Passenger Cars	Diesel	Medium	-0.00014572	0.0561194	-5.76328	329.078	0.996531
Nice	Passenger Cars	Diesel	Large-SUV-Executive	-0.000250458	0.0873855	-8.4113	443.522	0.996781
Nice	Passenger Cars	CNG Bifuel	Mini	-0.000197403	0.0665855	-6.65537	342.012	0.997327
Nice	Passenger Cars	CNG Bifuel	Small	-0.000197403	0.0665855	-6.65537	342.012	0.997327
Nice	Passenger Cars	CNG Bifuel	Medium	-0.000197403	0.0665855	-6.65537	342.012	0.997327
Nice	Passenger Cars	CNG Bifuel	Large-SUV-Executive	-0.000197403	0.0665855	-6.65537	342.012	0.997327
Nice	Passenger Cars	Petrol Hybrid	Mini	-8.31806e-05	0.0302664	-2.51236	180.625	0.99559
Nice	Passenger Cars	Petrol Hybrid	Small	-8.31806e-05	0.0302664	-2.51236	180.625	0.99559
Nice	Passenger Cars	Petrol Hybrid	Medium	-8.62888e-05	0.0319184	-2.73883	193.002	0.99559
Nice	Passenger Cars	Petrol Hybrid	Large-SUV-Executive	-8.92645e-05	0.0340542	-3.02514	210.809	0.995704
Nice	Passenger Cars	Petrol PHEV	Small	-0.000133299	0.0534721	-4.98086	226.043	0.990575
Nice	Passenger Cars	Petrol PHEV	Medium	-0.000160571	0.0645162	-6.02799	264.018	0.990503
Nice	Passenger Cars	Petrol PHEV	Large-SUV-Executive	-0.000189153	0.0758711	-7.06615	310.158	0.990579
Nice	Passenger Cars	Battery electric	Small	0	0	0	0
Nice	Passenger Cars	Battery electric	Medium	0	0	0	0
Nice	Passenger Cars	Battery electric	Large-SUV-Executive	0	0	0	0
Nice	Passenger Cars	Diesel PHEV	Large-SUV-Executive	-0.000176875	0.070922	-6.60091	287.541	0.990595
Nantes	L-Category	Diesel	Micro-car	0	0	0	106.453
Nantes	L-Category	Petrol	All	-8.90547e-05	0.0294751	-2.63265	163.386	0.989787
Nantes	Buses	Diesel	All	-0.0160877	4.17019	-270.742	5394.03	0.881887
Nantes	Buses	CNG	Urban CNG Buses	-0.000231141	0.0725103	-7.37042	1448.05	0.994349
Nantes	Buses	Diesel Hybrid	Urban Buses Diesel Hybrid	-0.0020965	0.532537	-35.9408	1225.49	0.900569
Nantes	Buses	Biodiesel	Urban Biodiesel Buses	-0.000863716	0.266708	-26.4416	1413.56	0.995207
Nantes	Buses	Battery electric	All	0	0	0	0
Nantes	Buses	Diesel PHEV	All	-0.0020965	0.532537	-35.9408	1225.49	0.900569
Nantes	Buses	Petrol	All	-0.000655505	0.18829	-16.7771	921.955	0.971085
Nantes	Heavy Duty Trucks	Petrol	>3,5 t	-0.000655505	0.18829	-16.7771	921.955	0.971085
Nantes	Heavy Duty Trucks	Diesel	All	-0.00102969	0.320987	-32.3502	1673.8	0.993594
Nantes	Heavy Duty Trucks	Diesel PHEV	All	-0.0020965	0.532537	-35.9408	1225.49	0.900569
Nantes	Heavy Duty Trucks	Battery electric	All	0	0	0	0
Nantes	Heavy Duty Trucks	CNG	All	-0.000231141	0.0725103	-7.37042	1448.05	0.994349
Nantes	Light Commercial Vehicles	Diesel	All	-0.000465547	0.134361	-11.0333	476.156	0.979788
Nantes	Light Commercial Vehicles	Petrol	All	-0.00034444	0.119379	-11.9112	578.654	0.991985
Nantes	Light Commercial Vehicles	Diesel PHEV	All	-0.000179227	0.071865	-6.68867	291.364	0.990595
Nantes	Light Commercial Vehicles	Battery electric	All	0	0	0	0
Nantes	Light Commercial Vehicles	CNG	All	-0.000199928	0.0675417	-6.75474	347.358	0.997294
Nantes	Light Commercial Vehicles	Petrol Hybrid	All	-9.277e-05	0.0354886	-3.18103	219.451	0.995789
Nantes	Light Commercial Vehicles	Petrol PHEV	All	-0.000192147	0.0770722	-7.17802	315.068	0.990579
Nantes	Passenger Cars	Petrol	Mini	-0.000263317	0.0797883	-6.87877	320.487	0.990788
Nantes	Passenger Cars	Petrol	Small	-0.000280469	0.0939049	-8.7593	414.194	0.997025
Nantes	Passenger Cars	Petrol	Medium	-0.000345719	0.115122	-10.8133	503.958	0.997647
Nantes	Passenger Cars	Petrol	Large-SUV-Executive	-0.000460237	0.150867	-14.7621	687.802	0.995033
Nantes	Passenger Cars	Diesel	Mini	-0.000164489	0.0471814	-3.74106	200.425	0.977803
Nantes	Passenger Cars	Diesel	Small	-0.000147657	0.0568655	-5.83991	333.453	0.996531
Nantes	Passenger Cars	Diesel	Medium	-0.000147657	0.0568655	-5.83991	333.453	0.996531
Nantes	Passenger Cars	Diesel	Large-SUV-Executive	-0.000253788	0.0885474	-8.52313	449.419	0.996781
Nantes	Passenger Cars	CNG Bifuel	Mini	-0.000199928	0.0675417	-6.75474	347.358	0.997294
Nantes	Passenger Cars	CNG Bifuel	Small	-0.000199928	0.0675417	-6.75474	347.358	0.997294
Nantes	Passenger Cars	CNG Bifuel	Medium	-0.000199928	0.0675417	-6.75474	347.358	0.997294
Nantes	Passenger Cars	CNG Bifuel	Large-SUV-Executive	-0.000199928	0.0675417	-6.75474	347.358	0.997294
Nantes	Passenger Cars	Petrol Hybrid	Mini	-8.60409e-05	0.031299	-2.61385	186.065	0.995669
Nantes	Passenger Cars	Petrol Hybrid	Small	-8.60409e-05	0.031299	-2.61385	186.065	0.995669
Nantes	Passenger Cars	Petrol Hybrid	Medium	-8.94788e-05	0.0331262	-2.86434	199.755	0.995671
Nantes	Passenger Cars	Petrol Hybrid	Large-SUV-Executive	-9.277e-05	0.0354886	-3.18103	219.451	0.995789
Nantes	Passenger Cars	Petrol PHEV	Small	-0.000135409	0.0543186	-5.05971	229.621	0.990575
Nantes	Passenger Cars	Petrol PHEV	Medium	-0.000163113	0.0655376	-6.12342	268.197	0.990503
Nantes	Passenger Cars	Petrol PHEV	Large-SUV-Executive	-0.000192147	0.0770722	-7.17802	315.068	0.990579
Nantes	Passenger Cars	Battery electric	Small	0	0	0	0
Nantes	Passenger Cars	Battery electric	Medium	0	0	0	0
Nantes	Passenger Cars	Battery electric	Large-SUV-Executive	0	0	0	0
Nantes	Passenger Cars	Diesel PHEV	Large-SUV-Executive	-0.000179227	0.071865	-6.68867	291.364	0.990595
Strasbourg	L-Category	Diesel	Micro-car	0	0	0	106.69
Strasbourg	L-Category	Petrol	All	-8.90547e-05	0.0294751	-2.63265	163.386	0.989787
Strasbourg	Buses	Diesel	All	-0.0160877	4.17019	-270.742	5394.03	0.881887
Strasbourg	Buses	CNG	Urban CNG Buses	-0.000231141	0.0725103	-7.37042	1448.05	0.994349
Strasbourg	Buses	Diesel Hybrid	Urban Buses Diesel Hybrid	-0.0020965	0.532537	-35.9408	1225.49	0.900569
Strasbourg	Buses	Biodiesel	Urban Biodiesel Buses	-0.000863716	0.266708	-26.4416	1413.56	0.995207
Strasbourg	Buses	Battery electric	All	0	0	0	0
Strasbourg	Buses	Diesel PHEV	All	-0.0020965	0.532537	-35.9408	1225.49	0.900569
Strasbourg	Buses	Petrol	All	-0.000655505	0.18829	-16.7771	921.955	0.971085
Strasbourg	Heavy Duty Trucks	Petrol	>3,5 t	-0.000655505	0.18829	-16.7771	921.955	0.971085
Strasbourg	Heavy Duty Trucks	Diesel	All	-0.00102969	0.320987	-32.3502	1673.8	0.993594
Strasbourg	Heavy Duty Trucks	Diesel PHEV	All	-0.0020965	0.532537	-35.9408	1225.49	0.900569
Strasbourg	Heavy Duty Trucks	Battery electric	All	0	0	0	0
Strasbourg	Heavy Duty Trucks	CNG	All	-0.000231141	0.0725103	-7.37042	1448.05	0.994349
Strasbourg	Light Commercial Vehicles	Diesel	All	-0.000468199	0.134978	-11.0758	477.483	0.979393
Strasbourg	Light Commercial Vehicles	Petrol	All	-0.000345544	0.119752	-11.9479	580.386	0.991956
Strasbourg	Light Commercial Vehicles	Diesel PHEV	All	-0.000179626	0.0720251	-6.70357	292.013	0.990595
Strasbourg	Light Commercial Vehicles	Battery electric	All	0	0	0	0
Strasbourg	Light Commercial Vehicles	CNG	All	-0.000200348	0.0677006	-6.77126	348.246	0.997289
Strasbourg	Light Commercial Vehicles	Petrol Hybrid	All	-9.33527e-05	0.035727	-3.20694	220.887	0.995803
Strasbourg	Light Commercial Vehicles	Petrol PHEV	All	-0.000192645	0.0772718	-7.19661	315.884	0.990579
Strasbourg	Passenger Cars	Petrol	Mini	-0.000263793	0.07996	-6.89564	321.392	0.990806
Strasbourg	Passenger Cars	Petrol	Small	-0.00028109	0.0941244	-8.78022	415.218	0.997024
Strasbourg	Passenger Cars	Petrol	Medium	-0.000346566	0.115415	-10.8414	505.263	0.997647
Strasbourg	Passenger Cars	Petrol	Large-SUV-Executive	-0.000461295	0.151228	-14.7977	689.477	0.995034
Strasbourg	Passenger Cars	Diesel	Mini	-0.000164855	0.0472866	-3.74939	200.872	0.977803
Strasbourg	Passenger Cars	Diesel	Small	-0.000147986	0.0569922	-5.85292	334.196	0.996531
Strasbourg	Passenger Cars	Diesel	Medium	-0.000147986	0.0569922	-5.85292	334.196	0.996531
Strasbourg	Passenger Cars	Diesel	Large-SUV-Executive	-0.000254354	0.0887447	-8.54212	450.42	0.996781
Strasbourg	Passenger Cars	CNG Bifuel	Mini	-0.000200348	0.0677006	-6.77126	348.246	0.997289
Strasbourg	Passenger Cars	CNG Bifuel	Small	-0.000200348	0.0677006	-6.77126	348.246	0.997289
Strasbourg	Passenger Cars	CNG Bifuel	Medium	-0.000200348	0.0677006	-6.77126	348.246	0.997289
Strasbourg	Passenger Cars	CNG Bifuel	Large-SUV-Executive	-0.000200348	0.0677006	-6.77126	348.246	0.997289
Strasbourg	Passenger Cars	Petrol Hybrid	Mini	-8.65163e-05	0.0314707	-2.63073	186.969	0.995681
Strasbourg	Passenger Cars	Petrol Hybrid	Small	-8.65163e-05	0.0314707	-2.63073	186.969	0.995681
Strasbourg	Passenger Cars	Petrol Hybrid	Medium	-9.0009e-05	0.033327	-2.88521	200.877	0.995684
Strasbourg	Passenger Cars	Petrol Hybrid	Large-SUV-Executive	-9.33527e-05	0.035727	-3.20694	220.887	0.995803
Strasbourg	Passenger Cars	Petrol PHEV	Small	-0.00013576	0.0544594	-5.07282	230.216	0.990575
Strasbourg	Passenger Cars	Petrol PHEV	Medium	-0.000163536	0.0657074	-6.13928	268.892	0.990503
Strasbourg	Passenger Cars	Petrol PHEV	Large-SUV-Executive	-0.000192645	0.0772718	-7.19661	315.884	0.990579
Strasbourg	Passenger Cars	Battery electric	Small	0	0	0	0
Strasbourg	Passenger Cars	Battery electric	Medium	0	0	0	0
Strasbourg	Passenger Cars	Battery electric	Large-SUV-Executive	0	0	0	0
Strasbourg	Passenger Cars	Diesel PHEV	Large-SUV-Executive	-0.000179626	0.0720251	-6.70357	292.013	0.990595
Bordeaux	L-Category	Diesel	Micro-car	0	0	0	104.967
Bordeaux	L-Category	Petrol	All	-8.90547e-05	0.0294751	-2.63265	163.386	0.989787
Bordeaux	Buses	Diesel	All	-0.0160877	4.17019	-270.742	5394.03	0.881887
Bordeaux	Buses	CNG	Urban CNG Buses	-0.000231141	0.0725103	-7.37042	1448.05	0.994349
Bordeaux	Buses	Diesel Hybrid	Urban Buses Diesel Hybrid	-0.0020965	0.532537	-35.9408	1225.49	0.900569
Bordeaux	Buses	Biodiesel	Urban Biodiesel Buses	-0.000863716	0.266708	-26.4416	1413.56	0.995207
Bordeaux	Buses	Battery electric	All	0	0	0	0
Bordeaux	Buses	Diesel PHEV	All	-0.0020965	0.532537	-35.9408	1225.49	0.900569
Bordeaux	Buses	Petrol	All	-0.000655505	0.18829	-16.7771	921.955	0.971085
Bordeaux	Heavy Duty Trucks	Petrol	>3,5 t	-0.000655505	0.18829	-16.7771	921.955	0.971085
Bordeaux	Heavy Duty Trucks	Diesel	All	-0.00102969	0.320987	-32.3502	1673.8	0.993594
Bordeaux	Heavy Duty Trucks	Diesel PHEV	All	-0.0020965	0.532537	-35.9408	1225.49	0.900569
Bordeaux	Heavy Duty Trucks	Battery electric	All	0	0	0	0
Bordeaux	Heavy Duty Trucks	CNG	All	-0.000231141	0.0725103	-7.37042	1448.05	0.994349
Bordeaux	Light Commercial Vehicles	Diesel	All	-0.000448928	0.13049	-10.7671	467.842	0.982199
Bordeaux	Light Commercial Vehicles	Petrol	All	-0.000337324	0.116973	-11.6744	567.48	0.992174
Bordeaux	Light Commercial Vehicles	Diesel PHEV	All	-0.000176724	0.0708615	-6.59527	287.295	0.990595
Bordeaux	Light Commercial Vehicles	Battery electric	All	0	0	0	0
Bordeaux	Light Commercial Vehicles	CNG	All	-0.00019722	0.0665162	-6.64818	341.625	0.997329
Bordeaux	Light Commercial Vehicles	Petrol Hybrid	All	-8.90107e-05	0.0339504	-3.01386	210.184	0.995698
Bordeaux	Light Commercial Vehicles	Petrol PHEV	All	-0.000188936	0.0757841	-7.05805	309.802	0.990579
Bordeaux	Passenger Cars	Petrol	Mini	-0.00026025	0.078681	-6.76992	314.654	0.990668
Bordeaux	Passenger Cars	Petrol	Small	-0.000276464	0.0924886	-8.62432	407.582	0.997027
Bordeaux	Passenger Cars	Petrol	Medium	-0.000340255	0.113232	-10.6325	495.546	0.997651
Bordeaux	Passenger Cars	Petrol	Large-SUV-Executive	-0.00045341	0.148532	-14.5325	676.996	0.995025
Bordeaux	Passenger Cars	Diesel	Mini	-0.000162192	0.0465226	-3.68882	197.626	0.977803
Bordeaux	Passenger Cars	Diesel	Small	-0.000145596	0.0560714	-5.75836	328.797	0.996531
Bordeaux	Passenger Cars	Diesel	Medium	-0.000145596	0.0560714	-5.75836	328.797	0.996531
Bordeaux	Passenger Cars	Diesel	Large-SUV-Executive	-0.000250244	0.0873109	-8.40412	443.143	0.996781
Bordeaux	Passenger Cars	CNG Bifuel	Mini	-0.00019722	0.0665162	-6.64818	341.625	0.997329
Bordeaux	Passenger Cars	CNG Bifuel	Small	-0.00019722	0.0665162	-6.64818	341.625	0.997329
Bordeaux	Passenger Cars	CNG Bifuel	Medium	-0.00019722	0.0665162	-6.64818	341.625	0.997329
Bordeaux	Passenger Cars	CNG Bifuel	Large-SUV-Executive	-0.00019722	0.0665162	-6.64818	341.625	0.997329
Bordeaux	Passenger Cars	Petrol Hybrid	Mini	-8.29735e-05	0.0301917	-2.50501	180.231	0.995584
Bordeaux	Passenger Cars	Petrol Hybrid	Small	-8.29735e-05	0.0301917	-2.50501	180.231	0.995584
Bordeaux	Passenger Cars	Petrol Hybrid	Medium	-8.60579e-05	0.031831	-2.72974	192.513	0.995584
Bordeaux	Passenger Cars	Petrol Hybrid	Large-SUV-Executive	-8.90107e-05	0.0339504	-3.01386	210.184	0.995698
Bordeaux	Passenger Cars	Petrol PHEV	Small	-0.000133146	0.0534108	-4.97515	225.784	0.990575
Bordeaux	Passenger Cars	Petrol PHEV	Medium	-0.000160387	0.0644423	-6.02108	263.715	0.990503
Bordeaux	Passenger Cars	Petrol PHEV	Large-SUV-Executive	-0.000188936	0.0757841	-7.05805	309.802	0.990579
Bordeaux	Passenger Cars	Battery electric	Small	0	0	0	0
Bordeaux	Passenger Cars	Battery electric	Medium	0	0	0	0
Bordeaux	Passenger Cars	Battery electric	Large-SUV-Executive	0	0	0	0
Bordeaux	Passenger Cars	Diesel PHEV	Large-SUV-Executive	-0.000176724	0.0708615	-6.59527	287.295	0.990595
Montpellier	L-Category	Diesel	Micro-car	0	0	0	104.763
Montpellier	L-Category	Petrol	All	-8.90547e-05	0.0294751	-2.63265	163.386	0.989787
Montpellier	Buses	Diesel	All	-0.0160877	4.17019	-270.742	5394.03	0.881887
Montpellier	Buses	CNG	Urban CNG Buses	-0.000231141	0.0725103	-7.37042	1448.05	0.994349
Montpellier	Buses	Diesel Hybrid	Urban Buses Diesel Hybrid	-0.0020965	0.532537	-35.9408	1225.49	0.900569
Montpellier	Buses	Biodiesel	Urban Biodiesel Buses	-0.000863716	0.266708	-26.4416	1413.56	0.995207
Montpellier	Buses	Battery electric	All	0	0	0	0
Montpellier	Buses	Diesel PHEV	All	-0.0020965	0.532537	-35.9408	1225.49	0.900569
Montpellier	Buses	Petrol	All	-0.000655505	0.18829	-16.7771	921.955	0.971085
Montpellier	Heavy Duty Trucks	Petrol	>3,5 t	-0.000655505	0.18829	-16.7771	921.955	0.971085
Montpellier	Heavy Duty Trucks	Diesel	All	-0.00102969	0.320987	-32.3502	1673.8	0.993594
Montpellier	Heavy Duty Trucks	Diesel PHEV	All	-0.0020965	0.532537	-35.9408	1225.49	0.900569
Montpellier	Heavy Duty Trucks	Battery electric	All	0	0	0	0
Montpellier	Heavy Duty Trucks	CNG	All	-0.000231141	0.0725103	-7.37042	1448.05	0.994349
Montpellier	Light Commercial Vehicles	Diesel	All	-0.000446646	0.129958	-10.7305	466.701	0.982522
Montpellier	Light Commercial Vehicles	Petrol	All	-0.000336357	0.116647	-11.6423	565.962	0.9922
Montpellier	Light Commercial Vehicles	Diesel PHEV	All	-0.000176381	0.0707237	-6.58245	286.737	0.990595
Montpellier	Light Commercial Vehicles	Battery electric	All	0	0	0	0
Montpellier	Light Commercial Vehicles	CNG	All	-0.000196852	0.066377	-6.63371	340.846	0.997334
Montpellier	Light Commercial Vehicles	Petrol Hybrid	All	-8.85002e-05	0.0337415	-2.99116	208.926	0.995685
Montpellier	Light Commercial Vehicles	Petrol PHEV	All	-0.0001885	0.0756092	-7.04176	309.087	0.990579
Montpellier	Passenger Cars	Petrol	Mini	-0.000259833	0.0785306	-6.75515	313.862	0.990651
Montpellier	Passenger Cars	Petrol	Small	-0.00027592	0.0922962	-8.606	406.685	0.997027
Montpellier	Passenger Cars	Petrol	Medium	-0.000339513	0.112976	-10.6079	494.403	0.997652
Montpellier	Passenger Cars	Petrol	Large-SUV-Executive	-0.000452482	0.148215	-14.5013	675.529	0.995024
Montpellier	Passenger Cars	Diesel	Mini	-0.000161877	0.0464322	-3.68165	197.242	0.977803
Montpellier	Passenger Cars	Diesel	Small	-0.000145312	0.0559624	-5.74716	328.157	0.996531
Montpellier	Passenger Cars	Diesel	Medium	-0.000145312	0.0559624	-5.74716	328.157	0.996531
Montpellier	Passenger Cars	Diesel	Large-SUV-Executive	-0.000249758	0.0871411	-8.38777	442.281	0.996781
Montpellier	Passenger Cars	CNG Bifuel	Mini	-0.000196852	0.066377	-6.63371	340.846	0.997334
Montpellier	Passenger Cars	CNG Bifuel	Small	-0.000196852	0.066377	-6.63371	340.846	0.997334
Montpellier	Passenger Cars	CNG Bifuel	Medium	-0.000196852	0.066377	-6.63371	340.846	0.997334
Montpellier	Passenger Cars	CNG Bifuel	Large-SUV-Executive	-0.000196852	0.066377	-6.63371	340.846	0.997334
Montpellier	Passenger Cars	Petrol Hybrid	Mini	-8.2557e-05	0.0300413	-2.49023	179.439	0.995572
Montpellier	Passenger Cars	Petrol Hybrid	Small	-8.2557e-05	0.0300413	-2.49023	179.439	0.995572
Montpellier	Passenger Cars	Petrol Hybrid	Medium	-8.55934e-05	0.0316551	-2.71146	191.53	0.995571
Montpellier	Passenger Cars	Petrol Hybrid	Large-SUV-Executive	-8.85002e-05	0.0337415	-2.99116	208.926	0.995685
Montpellier	Passenger Cars	Petrol PHEV	Small	-0.000132839	0.0532876	-4.96367	225.263	0.990575
Montpellier	Passenger Cars	Petrol PHEV	Medium	-0.000160017	0.0642936	-6.00718	263.107	0.990503
Montpellier	Passenger Cars	Petrol PHEV	Large-SUV-Executive	-0.0001885	0.0756092	-7.04176	309.087	0.990579
Montpellier	Passenger Cars	Battery electric	Small	0	0	0	0
Montpellier	Passenger Cars	Battery electric	Medium	0	0	0	0
Montpellier	Passenger Cars	Battery electric	Large-SUV-Executive	0	0	0	0
Montpellier	Passenger Cars	Diesel PHEV	Large-SUV-Executive	-0.000176381	0.0707237	-6.58245	286.737	0.990595
Hamburg	L-Category	Diesel	Micro-car	0	0	0	108.172
Hamburg	L-Category	Petrol	All	-8.90547e-05	0.0294751	-2.63265	163.386	0.989787
Hamburg	Buses	Diesel	All	-0.0160877	4.17019	-270.742	5394.03	0.881887
Hamburg	Buses	CNG	Urban CNG Buses	-0.000231141	0.0725103	-7.37042	1448.05	0.994349
Hamburg	Buses	Diesel Hybrid	Urban Buses Diesel Hybrid	-0.0020965	0.532537	-35.9408	1225.49	0.900569
Hamburg	Buses	Biodiesel	Urban Biodiesel Buses	-0.000863716	0.266708	-26.4416	1413.56	0.995207
Hamburg	Buses	Battery electric	All	0	0	0	0
Hamburg	Buses	Diesel PHEV	All	-0.0020965	0.532537	-35.9408	1225.49	0.900569
Hamburg	Buses	Petrol	All	-0.000655505	0.18829	-16.7771	921.955	0.971085
Hamburg	Heavy Duty Trucks	Petrol	>3,5 t	-0.000655505	0.18829	-16.7771	921.955	0.971085
Hamburg	Heavy Duty Trucks	Diesel	All	-0.00102969	0.320987	-32.3502	1673.8	0.993594
Hamburg	Heavy Duty Trucks	Diesel PHEV	All	-0.0020965	0.532537	-35.9408	1225.49	0.900569
Hamburg	Heavy Duty Trucks	Battery electric	All	0	0	0	0
Hamburg	Heavy Duty Trucks	CNG	All	-0.000231141	0.0725103	-7.37042	1448.05	0.994349
Hamburg	Light Commercial Vehicles	Diesel	All	-0.00048476	0.138836	-11.3411	485.768	0.97687
Hamburg	Light Commercial Vehicles	Petrol	All	-0.0003526	0.122138	-12.1827	591.465	0.991773
Hamburg	Light Commercial Vehicles	Diesel PHEV	All	-0.00018212	0.0730252	-6.79665	296.068	0.990595
Hamburg	Light Commercial Vehicles	Battery electric	All	0	0	0	0
Hamburg	Light Commercial Vehicles	CNG	All	-0.000203033	0.0687174	-6.87692	353.931	0.997255
Hamburg	Light Commercial Vehicles	Petrol Hybrid	All	-9.70802e-05	0.0372521	-3.37269	230.076	0.995885
Hamburg	Light Commercial Vehicles	Petrol PHEV	All	-0.000195829	0.078549	-7.31556	321.105	0.990579
Hamburg	Passenger Cars	Petrol	Mini	-0.000266834	0.0810579	-7.00357	327.176	0.990918
Hamburg	Passenger Cars	Petrol	Small	-0.000285061	0.0955288	-8.91406	421.773	0.997022
Hamburg	Passenger Cars	Petrol	Medium	-0.000351983	0.117289	-11.0207	513.604	0.997643
Hamburg	Passenger Cars	Petrol	Large-SUV-Executive	-0.000468065	0.153544	-15.0254	700.191	0.995042
Hamburg	Passenger Cars	Diesel	Mini	-0.000167144	0.0479431	-3.80145	203.661	0.977803
Hamburg	Passenger Cars	Diesel	Small	-0.000150041	0.0577835	-5.93418	338.836	0.996531
Hamburg	Passenger Cars	Diesel	Medium	-0.000150041	0.0577835	-5.93418	338.836	0.996531
Hamburg	Passenger Cars	Diesel	Large-SUV-Executive	-0.000257885	0.0899768	-8.66073	456.674	0.996781
Hamburg	Passenger Cars	CNG Bifuel	Mini	-0.000203033	0.0687174	-6.87692	353.931	0.997255
Hamburg	Passenger Cars	CNG Bifuel	Small	-0.000203033	0.0687174	-6.87692	353.931	0.997255
Hamburg	Passenger Cars	CNG Bifuel	Medium	-0.000203033	0.0687174	-6.87692	353.931	0.997255
Hamburg	Passenger Cars	CNG Bifuel	Large-SUV-Executive	-0.000203033	0.0687174	-6.87692	353.931	0.997255
Hamburg	Passenger Cars	Petrol Hybrid	Mini	-8.95577e-05	0.0325686	-2.73865	192.754	0.995759
Hamburg	Passenger Cars	Petrol Hybrid	Small	-8.95577e-05	0.0325686	-2.73865	192.754	0.995759
Hamburg	Passenger Cars	Petrol Hybrid	Medium	-9.34009e-05	0.0346113	-3.01867	208.058	0.995763
Hamburg	Passenger Cars	Petrol Hybrid	Large-SUV-Executive	-9.70802e-05	0.0372521	-3.37269	230.076	0.995885
Hamburg	Passenger Cars	Petrol PHEV	Small	-0.000138004	0.0553595	-5.15666	234.021	0.990575
Hamburg	Passenger Cars	Petrol PHEV	Medium	-0.000166239	0.0667934	-6.24075	273.337	0.990503
Hamburg	Passenger Cars	Petrol PHEV	Large-SUV-Executive	-0.000195829	0.078549	-7.31556	321.105	0.990579
Hamburg	Passenger Cars	Battery electric	Small	0	0	0	0
Hamburg	Passenger Cars	Battery electric	Medium	0	0	0	0
Hamburg	Passenger Cars	Battery electric	Large-SUV-Executive	0	0	0	0
Hamburg	Passenger Cars	Diesel PHEV	Large-SUV-Executive	-0.00018212	0.0730252	-6.79665	296.068	0.990595
München	L-Category	Diesel	Micro-car	0	0	0	107.687
München	L-Category	Petrol	All	-8.90547e-05	0.0294751	-2.63265	163.386	0.989787
München	Buses	Diesel	All	-0.0160877	4.17019	-270.742	5394.03	0.881887
München	Buses	CNG	Urban CNG Buses	-0.000231141	0.0725103	-7.37042	1448.05	0.994349
München	Buses	Diesel Hybrid	Urban Buses Diesel Hybrid	-0.0020965	0.532537	-35.9408	1225.49	0.900569
München	Buses	Biodiesel	Urban Biodiesel Buses	-0.000863716	0.266708	-26.4416	1413.56	0.995207
München	Buses	Battery electric	All	0	0	0	0
München	Buses	Diesel PHEV	All	-0.0020965	0.532537	-35.9408	1225.49	0.900569
München	Buses	Petrol	All	-0.000655505	0.18829	-16.7771	921.955	0.971085
München	Heavy Duty Trucks	Petrol	>3,5 t	-0.000655505	0.18829	-16.7771	921.955	0.971085
München	Heavy Duty Trucks	Diesel	All	-0.00102969	0.320987	-32.3502	1673.8	0.993594
München	Heavy Duty Trucks	Diesel PHEV	All	-0.0020965	0.532537	-35.9408	1225.49	0.900569
München	Heavy Duty Trucks	Battery electric	All	0	0	0	0
München	Heavy Duty Trucks	CNG	All	-0.000231141	0.0725103	-7.37042	1448.05	0.994349
München	Light Commercial Vehicles	Diesel	All	-0.000479337	0.137573	-11.2542	483.055	0.977706
München	Light Commercial Vehicles	Petrol	All	-0.00035026	0.121347	-12.1048	587.791	0.991833
München	Light Commercial Vehicles	Diesel PHEV	All	-0.000181304	0.0726977	-6.76617	294.74	0.990595
München	Light Commercial Vehicles	Battery electric	All	0	0	0	0
München	Light Commercial Vehicles	CNG	All	-0.000202143	0.0683801	-6.84188	352.045	0.997266
München	Light Commercial Vehicles	Petrol Hybrid	All	-9.5844e-05	0.0367463	-3.31772	227.028	0.995859
München	Light Commercial Vehicles	Petrol PHEV	All	-0.000194773	0.0781254	-7.27611	319.373	0.990579
München	Passenger Cars	Petrol	Mini	-0.000265825	0.0806938	-6.96777	325.258	0.990882
München	Passenger Cars	Petrol	Small	-0.000283744	0.095063	-8.86967	419.599	0.997023
München	Passenger Cars	Petrol	Medium	-0.000350187	0.116668	-10.9612	510.837	0.997644
München	Passenger Cars	Petrol	Large-SUV-Executive	-0.000465819	0.152776	-14.9498	696.638	0.995039
München	Passenger Cars	Diesel	Mini	-0.000166395	0.0477281	-3.78441	202.747	0.977803
München	Passenger Cars	Diesel	Small	-0.000149368	0.0575244	-5.90758	337.317	0.996531
München	Passenger Cars	Diesel	Medium	-0.000149368	0.0575244	-5.90758	337.317	0.996531
München	Passenger Cars	Diesel	Large-SUV-Executive	-0.000256729	0.0895734	-8.62189	454.626	0.996781
München	Passenger Cars	CNG Bifuel	Mini	-0.000202143	0.0683801	-6.84188	352.045	0.997266
München	Passenger Cars	CNG Bifuel	Small	-0.000202143	0.0683801	-6.84188	352.045	0.997266
München	Passenger Cars	CNG Bifuel	Medium	-0.000202143	0.0683801	-6.84188	352.045	0.997266
München	Passenger Cars	CNG Bifuel	Large-SUV-Executive	-0.000202143	0.0683801	-6.84188	352.045	0.997266
München	Passenger Cars	Petrol Hybrid	Mini	-8.8549e-05	0.0322045	-2.70286	190.835	0.995734
München	Passenger Cars	Petrol Hybrid	Small	-8.8549e-05	0.0322045	-2.70286	190.835	0.995734
München	Passenger Cars	Petrol Hybrid	Medium	-9.22759e-05	0.0341853	-2.97441	205.676	0.995737
München	Passenger Cars	Petrol Hybrid	Large-SUV-Executive	-9.5844e-05	0.0367463	-3.31772	227.028	0.995859
München	Passenger Cars	Petrol PHEV	Small	-0.00013726	0.055061	-5.12886	232.759	0.990575
München	Passenger Cars	Petrol PHEV	Medium	-0.000165343	0.0664332	-6.2071	271.863	0.990503
München	Passenger Cars	Petrol PHEV	Large-SUV-Executive	-0.000194773	0.0781254	-7.27611	319.373	0.990579
München	Passenger Cars	Battery electric	Small	0	0	0	0
München	Passenger Cars	Battery electric	Medium	0	0	0	0
München	Passenger Cars	Battery electric	Large-SUV-Executive	0	0	0	0
München	Passenger Cars	Diesel PHEV	Large-SUV-Executive	-0.000181304	0.0726977	-6.76617	294.74	0.990595
Köln	L-Category	Diesel	Micro-car	0	0	0	107.407
Köln	L-Category	Petrol	All	-8.90547e-05	0.0294751	-2.63265	163.386	0.989787
Köln	Buses	Diesel	All	-0.0160877	4.17019	-270.742	5394.03	0.881887
Köln	Buses	CNG	Urban CNG Buses	-0.000231141	0.0725103	-7.37042	1448.05	0.994349
Köln	Buses	Diesel Hybrid	Urban Buses Diesel Hybrid	-0.0020965	0.532537	-35.9408	1225.49	0.900569
Köln	Buses	Biodiesel	Urban Biodiesel Buses	-0.000863716	0.266708	-26.4416	1413.56	0.995207
Köln	Buses	Battery electric	All	0	0	0	0
Köln	Buses	Diesel PHEV	All	-0.0020965	0.532537	-35.9408	1225.49	0.900569
Köln	Buses	Petrol	All	-0.000655505	0.18829	-16.7771	921.955	0.971085
Köln	Heavy Duty Trucks	Petrol	>3,5 t	-0.000655505	0.18829	-16.7771	921.955	0.971085
Köln	Heavy Duty Trucks	Diesel	All	-0.00102969	0.320987	-32.3502	1673.8	0.993594
Köln	Heavy Duty Trucks	Diesel PHEV	All	-0.0020965	0.532537	-35.9408	1225.49	0.900569
Köln	Heavy Duty Trucks	Battery electric	All	0	0	0	0
Köln	Heavy Duty Trucks	CNG	All	-0.000231141	0.0725103	-7.37042	1448.05	0.994349
Köln	Light Commercial Vehicles	Diesel	All	-0.000476208	0.136844	-11.2041	481.49	0.978185
Köln	Light Commercial Vehicles	Petrol	All	-0.000348966	0.12091	-12.0618	585.76	0.991867
Köln	Light Commercial Vehicles	Diesel PHEV	All	-0.000180833	0.0725088	-6.74859	293.974	0.990595
Köln	Light Commercial Vehicles	Battery electric	All	0	0	0	0
Köln	Light Commercial Vehicles	CNG	All	-0.00020165	0.0681937	-6.82251	351.003	0.997272
Köln	Light Commercial Vehicles	Petrol Hybrid	All	-9.51606e-05	0.0364667	-3.28733	225.344	0.995844
Köln	Light Commercial Vehicles	Petrol PHEV	All	-0.000194189	0.0778913	-7.2543	318.416	0.990579
Köln	Passenger Cars	Petrol	Mini	-0.000265268	0.0804925	-6.94799	324.197	0.990861
Köln	Passenger Cars	Petrol	Small	-0.000283016	0.0948056	-8.84513	418.398	0.997023
Köln	Passenger Cars	Petrol	Medium	-0.000349193	0.116324	-10.9283	509.308	0.997645
Köln	Passenger Cars	Petrol	Large-SUV-Executive	-0.000464578	0.152351	-14.9081	694.673	0.995038
Köln	Passenger Cars	Diesel	Mini	-0.000165962	0.0476041	-3.77457	202.22	0.977803
Köln	Passenger Cars	Diesel	Small	-0.00014898	0.0573749	-5.89222	336.44	0.996531
Köln	Passenger Cars	Diesel	Medium	-0.00014898	0.0573749	-5.89222	336.44	0.996531
Köln	Passenger Cars	Diesel	Large-SUV-Executive	-0.000256062	0.0893406	-8.59948	453.444	0.996781
Köln	Passenger Cars	CNG Bifuel	Mini	-0.00020165	0.0681937	-6.82251	351.003	0.997272
Köln	Passenger Cars	CNG Bifuel	Small	-0.00020165	0.0681937	-6.82251	351.003	0.997272
Köln	Passenger Cars	CNG Bifuel	Medium	-0.00020165	0.0681937	-6.82251	351.003	0.997272
Köln	Passenger Cars	CNG Bifuel	Large-SUV-Executive	-0.00020165	0.0681937	-6.82251	351.003	0.997272
Köln	Passenger Cars	Petrol Hybrid	Mini	-8.79914e-05	0.0320032	-2.68307	189.775	0.99572
Köln	Passenger Cars	Petrol Hybrid	Small	-8.79914e-05	0.0320032	-2.68307	189.775	0.99572
Köln	Passenger Cars	Petrol Hybrid	Medium	-9.16541e-05	0.0339499	-2.94994	204.36	0.995723
Köln	Passenger Cars	Petrol Hybrid	Large-SUV-Executive	-9.51606e-05	0.0364667	-3.28733	225.344	0.995844
Köln	Passenger Cars	Petrol PHEV	Small	-0.000136848	0.0548959	-5.11348	232.062	0.990575
Köln	Passenger Cars	Petrol PHEV	Medium	-0.000164847	0.0662341	-6.18849	271.048	0.990503
Köln	Passenger Cars	Petrol PHEV	Large-SUV-Executive	-0.000194189	0.0778913	-7.2543	318.416	0.990579
Köln	Passenger Cars	Battery electric	Small	0	0	0	0
Köln	Passenger Cars	Battery electric	Medium	0	0	0	0
Köln	Passenger Cars	Battery electric	Large-SUV-Executive	0	0	0	0
Köln	Passenger Cars	Diesel PHEV	Large-SUV-Executive	-0.000180833	0.0725088	-6.74859	293.974	0.990595
Frankfurt	L-Category	Diesel	Micro-car	0	0	0	107.346
Frankfurt	L-Category	Petrol	All	-8.90547e-05	0.0294751	-2.63265	163.386	0.989787
Frankfurt	Buses	Diesel	All	-0.0160877	4.17019	-270.742	5394.03	0.881887
Frankfurt	Buses	CNG	Urban CNG Buses	-0.000231141	0.0725103	-7.37042	1448.05	0.994349
Frankfurt	Buses	Diesel Hybrid	Urban Buses Diesel Hybrid	-0.0020965	0.532537	-35.9408	1225.49	0.900569
Frankfurt	Buses	Biodiesel	Urban Biodiesel Buses	-0.000863716	0.266708	-26.4416	1413.56	0.995207
Frankfurt	Buses	Battery electric	All	0	0	0	0
Frankfurt	Buses	Diesel PHEV	All	-0.0020965	0.532537	-35.9408	1225.49	0.900569
Frankfurt	Buses	Petrol	All	-0.000655505	0.18829	-16.7771	921.955	0.971085
Frankfurt	Heavy Duty Trucks	Petrol	>3,5 t	-0.000655505	0.18829	-16.7771	921.955	0.971085
Frankfurt	Heavy Duty Trucks	Diesel	All	-0.00102969	0.320987	-32.3502	1673.8	0.993594
Frankfurt	Heavy Duty Trucks	Diesel PHEV	All	-0.0020965	0.532537	-35.9408	1225.49	0.900569
Frankfurt	Heavy Duty Trucks	Battery electric	All	0	0	0	0
Frankfurt	Heavy Duty Trucks	CNG	All	-0.000231141	0.0725103	-7.37042	1448.05	0.994349
Frankfurt	Light Commercial Vehicles	Diesel	All	-0.000475527	0.136685	-11.1932	481.149	0.978288
Frankfurt	Light Commercial Vehicles	Petrol	All	-0.000348656	0.120805	-12.0515	585.273	0.991875
Frankfurt	Light Commercial Vehicles	Diesel PHEV	All	-0.00018073	0.0724677	-6.74476	293.807	0.990595
Frankfurt	Light Commercial Vehicles	Battery electric	All	0	0	0	0
Frankfurt	Light Commercial Vehicles	CNG	All	-0.000201532	0.0681491	-6.81787	350.754	0.997274
Frankfurt	Light Commercial Vehicles	Petrol Hybrid	All	-9.49969e-05	0.0363997	-3.28005	224.94	0.99584
Frankfurt	Light Commercial Vehicles	Petrol PHEV	All	-0.000194049	0.0778352	-7.24908	318.187	0.990579
Frankfurt	Passenger Cars	Petrol	Mini	-0.000265134	0.0804443	-6.94325	323.943	0.990856
Frankfurt	Passenger Cars	Petrol	Small	-0.000282842	0.0947439	-8.83926	418.11	0.997023
Frankfurt	Passenger Cars	Petrol	Medium	-0.000348956	0.116242	-10.9205	508.942	0.997645
Frankfurt	Passenger Cars	Petrol	Large-SUV-Executive	-0.000464281	0.15225	-14.8981	694.203	0.995037
Frankfurt	Passenger Cars	Diesel	Mini	-0.000165868	0.0475771	-3.77243	202.106	0.977803
Frankfurt	Passenger Cars	Diesel	Small	-0.000148896	0.0573424	-5.88888	336.249	0.996531
Frankfurt	Passenger Cars	Diesel	Medium	-0.000148896	0.0573424	-5.88888	336.249	0.996531
Frankfurt	Passenger Cars	Diesel	Large-SUV-Executive	-0.000255916	0.0892899	-8.59461	453.187	0.996781
Frankfurt	Passenger Cars	CNG Bifuel	Mini	-0.000201532	0.0681491	-6.81787	350.754	0.997274
Frankfurt	Passenger Cars	CNG Bifuel	Small	-0.000201532	0.0681491	-6.81787	350.754	0.997274
Frankfurt	Passenger Cars	CNG Bifuel	Medium	-0.000201532	0.0681491	-6.81787	350.754	0.997274
Frankfurt	Passenger Cars	CNG Bifuel	Large-SUV-Executive	-0.000201532	0.0681491	-6.81787	350.754	0.997274
Frankfurt	Passenger Cars	Petrol Hybrid	Mini	-8.78579e-05	0.031955	-2.67833	189.521	0.995716
Frankfurt	Passenger Cars	Petrol Hybrid	Small	-8.78579e-05	0.031955	-2.67833	189.521	0.995716
Frankfurt	Passenger Cars	Petrol Hybrid	Medium	-9.15052e-05	0.0338935	-2.94408	204.045	0.995719
Frankfurt	Passenger Cars	Petrol Hybrid	Large-SUV-Executive	-9.49969e-05	0.0363997	-3.28005	224.94	0.99584
Frankfurt	Passenger Cars	Petrol PHEV	Small	-0.00013675	0.0548564	-5.1098	231.894	0.990575
Frankfurt	Passenger Cars	Petrol PHEV	Medium	-0.000164728	0.0661864	-6.18404	270.853	0.990503
Frankfurt	Passenger Cars	Petrol PHEV	Large-SUV-Executive	-0.000194049	0.0778352	-7.24908	318.187	0.990579
Frankfurt	Passenger Cars	Battery electric	Small	0	0	0	0
Frankfurt	Passenger Cars	Battery electric	Medium	0	0	0	0
Frankfurt	Passenger Cars	Battery electric	Large-SUV-Executive	0	0	0	0
Frankfurt	Passenger Cars	Diesel PHEV	Large-SUV-Executive	-0.00018073	0.0724677	-6.74476	293.807	0.990595
Stuttgart	L-Category	Diesel	Micro-car	0	0	0	107.459
Stuttgart	L-Category	Petrol	All	-8.90547e-05	0.0294751	-2.63265	163.386	0.989787
Stuttgart	Buses	Diesel	All	-0.0160877	4.17019	-270.742	5394.03	0.881887
Stuttgart	Buses	CNG	Urban CNG Buses	-0.000231141	0.0725103	-7.37042	1448.05	0.994349
Stuttgart	Buses	Diesel Hybrid	Urban Buses Diesel Hybrid	-0.0020965	0.532537	-35.9408	1225.49	0.900569
Stuttgart	Buses	Biodiesel	Urban Biodiesel Buses	-0.000863716	0.266708	-26.4416	1413.56	0.995207
Stuttgart	Buses	Battery electric	All	0	0	0	0
Stuttgart	Buses	Diesel PHEV	All	-0.0020965	0.532537	-35.9408	1225.49	0.900569
Stuttgart	Buses	Petrol	All	-0.000655505	0.18829	-16.7771	921.955	0.971085
Stuttgart	Heavy Duty Trucks	Petrol	>3,5 t	-0.000655505	0.18829	-16.7771	921.955	0.971085
Stuttgart	Heavy Duty Trucks	Diesel	All	-0.00102969	0.320987	-32.3502	1673.8	0.993594
Stuttgart	Heavy Duty Trucks	Diesel PHEV	All	-0.0020965	0.532537	-35.9408	1225.49	0.900569
Stuttgart	Heavy Duty Trucks	Battery electric	All	0	0	0	0
Stuttgart	Heavy Duty Trucks	CNG	All	-0.000231141	0.0725103	-7.37042	1448.05	0.994349
Stuttgart	Light Commercial Vehicles	Diesel	All	-0.000476795	0.136981	-11.2135	481.784	0.978095
Stuttgart	Light Commercial Vehicles	Petrol	All	-0.000349201	0.120989	-12.0696	586.128	0.991861
Stuttgart	Light Commercial Vehicles	Diesel PHEV	All	-0.000180921	0.0725442	-6.75189	294.118	0.990595
Stuttgart	Light Commercial Vehicles	Battery electric	All	0	0	0	0
Stuttgart	Light Commercial Vehicles	CNG	All	-0.00020174	0.0682276	-6.82602	351.193	0.997271
Stuttgart	Light Commercial Vehicles	Petrol Hybrid	All	-9.52847e-05	0.0365175	-3.29285	225.65	0.995847
Stuttgart	Light Commercial Vehicles	Petrol PHEV	All	-0.000194295	0.0779338	-7.25826	318.59	0.990579
Stuttgart	Passenger Cars	Petrol	Mini	-0.000265369	0.080529	-6.95158	324.39	0.990865
Stuttgart	Passenger Cars	Petrol	Small	-0.000283148	0.0948523	-8.84959	418.616	0.997023
Stuttgart	Passenger Cars	Petrol	Medium	-0.000349374	0.116387	-10.9343	509.586	0.997645
Stuttgart	Passenger Cars	Petrol	Large-SUV-Executive	-0.000464804	0.152428	-14.9157	695.03	0.995038
Stuttgart	Passenger Cars	Diesel	Mini	-0.000166044	0.0476274	-3.77642	202.319	0.977803
Stuttgart	Passenger Cars	Diesel	Small	-0.000149053	0.057403	-5.8951	336.604	0.996531
Stuttgart	Passenger Cars	Diesel	Medium	-0.000149053	0.057403	-5.8951	336.604	0.996531
Stuttgart	Passenger Cars	Diesel	Large-SUV-Executive	-0.000256187	0.0893843	-8.60369	453.666	0.996781
Stuttgart	Passenger Cars	CNG Bifuel	Mini	-0.00020174	0.0682276	-6.82602	351.193	0.997271
Stuttgart	Passenger Cars	CNG Bifuel	Small	-0.00020174	0.0682276	-6.82602	351.193	0.997271
Stuttgart	Passenger Cars	CNG Bifuel	Medium	-0.00020174	0.0682276	-6.82602	351.193	0.997271
Stuttgart	Passenger Cars	CNG Bifuel	Large-SUV-Executive	-0.00020174	0.0682276	-6.82602	351.193	0.997271
Stuttgart	Passenger Cars	Petrol Hybrid	Mini	-8.80927e-05	0.0320397	-2.68666	189.967	0.995722
Stuttgart	Passenger Cars	Petrol Hybrid	Small	-8.80927e-05	0.0320397	-2.68666	189.967	0.995722
Stuttgart	Passenger Cars	Petrol Hybrid	Medium	-9.1767e-05	0.0339926	-2.95438	204.599	0.995726
Stuttgart	Passenger Cars	Petrol Hybrid	Large-SUV-Executive	-9.52847e-05	0.0365175	-3.29285	225.65	0.995847
Stuttgart	Passenger Cars	Petrol PHEV	Small	-0.000136923	0.0549259	-5.11628	232.188	0.990575
Stuttgart	Passenger Cars	Petrol PHEV	Medium	-0.000164937	0.0662703	-6.19187	271.196	0.990503
Stuttgart	Passenger Cars	Petrol PHEV	Large-SUV-Executive	-0.000194295	0.0779338	-7.25826	318.59	0.990579
Stuttgart	Passenger Cars	Battery electric	Small	0	0	0	0
Stuttgart	Passenger Cars	Battery electric	Medium	0	0	0	0
Stuttgart	Passenger Cars	Battery electric	Large-SUV-Executive	0	0	0	0
Stuttgart	Passenger Cars	Diesel PHEV	Large-SUV-Executive	-0.000180921	0.0725442	-6.75189	294.118	0.990595
Düsseldorf	L-Category	Diesel	Micro-car	0	0	0	107.324
Düsseldorf	L-Category	Petrol	All	-8.90547e-05	0.0294751	-2.63265	163.386	0.989787
Düsseldorf	Buses	Diesel	All	-0.0160877	4.17019	-270.742	5394.03	0.881887
Düsseldorf	Buses	CNG	Urban CNG Buses	-0.000231141	0.0725103	-7.37042	1448.05	0.994349
Düsseldorf	Buses	Diesel Hybrid	Urban Buses Diesel Hybrid	-0.0020965	0.532537	-35.9408	1225.49	0.900569
Düsseldorf	Buses	Biodiesel	Urban Biodiesel Buses	-0.000863716	0.266708	-26.4416	1413.56	0.995207
Düsseldorf	Buses	Battery electric	All	0	0	0	0
Düsseldorf	Buses	Diesel PHEV	All	-0.0020965	0.532537	-35.9408	1225.49	0.900569
Düsseldorf	Buses	Petrol	All	-0.000655505	0.18829	-16.7771	921.955	0.971085
Düsseldorf	Heavy Duty Trucks	Petrol	>3,5 t	-0.000655505	0.18829	-16.7771	921.955	0.971085
Düsseldorf	Heavy Duty Trucks	Diesel	All	-0.00102969	0.320987	-32.3502	1673.8	0.993594
Düsseldorf	Heavy Duty Trucks	Diesel PHEV	All	-0.0020965	0.532537	-35.9408	1225.49	0.900569
Düsseldorf	Heavy Duty Trucks	Battery electric	All	0	0	0	0
Düsseldorf	Heavy Duty Trucks	CNG	All	-0.000231141	0.0725103	-7.37042	1448.05	0.994349
Düsseldorf	Light Commercial Vehicles	Diesel	All	-0.000475287	0.136629	-11.1893	481.029	0.978325
Düsseldorf	Light Commercial Vehicles	Petrol	All	-0.000348581	0.120779	-12.049	585.154	0.991877
Düsseldorf	Light Commercial Vehicles	Diesel PHEV	All	-0.000180694	0.0724531	-6.74341	293.748	0.990595
Düsseldorf	Light Commercial Vehicles	Battery electric	All	0	0	0	0
Düsseldorf	Light Commercial Vehicles	CNG	All	-0.000201504	0.0681382	-6.81673	350.693	0.997274
Düsseldorf	Light Commercial Vehicles	Petrol Hybrid	All	-9.4957e-05	0.0363834	-3.27828	224.842	0.995839
Düsseldorf	Light Commercial Vehicles	Petrol PHEV	All	-0.000194015	0.0778215	-7.2478	318.131	0.990579
Düsseldorf	Passenger Cars	Petrol	Mini	-0.000265102	0.0804325	-6.94209	323.881	0.990855
Düsseldorf	Passenger Cars	Petrol	Small	-0.000282799	0.0947288	-8.83782	418.039	0.997023
Düsseldorf	Passenger Cars	Petrol	Medium	-0.000348897	0.116222	-10.9185	508.853	0.997645
Düsseldorf	Passenger Cars	Petrol	Large-SUV-Executive	-0.000464209	0.152225	-14.8957	694.088	0.995037
Düsseldorf	Passenger Cars	Diesel	Mini	-0.000165835	0.0475676	-3.77168	202.065	0.977803
Düsseldorf	Passenger Cars	Diesel	Small	-0.000148866	0.0573309	-5.8877	336.182	0.996531
Düsseldorf	Passenger Cars	Diesel	Medium	-0.000148866	0.0573309	-5.8877	336.182	0.996531
Düsseldorf	Passenger Cars	Diesel	Large-SUV-Executive	-0.000255865	0.089272	-8.59288	453.097	0.996781
Düsseldorf	Passenger Cars	CNG Bifuel	Mini	-0.000201504	0.0681382	-6.81673	350.693	0.997274
Düsseldorf	Passenger Cars	CNG Bifuel	Small	-0.000201504	0.0681382	-6.81673	350.693	0.997274
Düsseldorf	Passenger Cars	CNG Bifuel	Medium	-0.000201504	0.0681382	-6.81673	350.693	0.997274
Düsseldorf	Passenger Cars	CNG Bifuel	Large-SUV-Executive	-0.000201504	0.0681382	-6.81673	350.693	0.997274
Düsseldorf	Passenger Cars	Petrol Hybrid	Mini	-8.78253e-05	0.0319432	-2.67717	189.459	0.995715
Düsseldorf	Passenger Cars	Petrol Hybrid	Small	-8.78253e-05	0.0319432	-2.67717	189.459	0.995715
Düsseldorf	Passenger Cars	Petrol Hybrid	Medium	-9.14688e-05	0.0338797	-2.94265	203.968	0.995719
Düsseldorf	Passenger Cars	Petrol Hybrid	Large-SUV-Executive	-9.4957e-05	0.0363834	-3.27828	224.842	0.995839
Düsseldorf	Passenger Cars	Petrol PHEV	Small	-0.000136726	0.0548468	-5.1089	231.854	0.990575
Düsseldorf	Passenger Cars	Petrol PHEV	Medium	-0.000164699	0.0661748	-6.18295	270.805	0.990503
Düsseldorf	Passenger Cars	Petrol PHEV	Large-SUV-Executive	-0.000194015	0.0778215	-7.2478	318.131	0.990579
Düsseldorf	Passenger Cars	Battery electric	Small	0	0	0	0
Düsseldorf	Passenger Cars	Battery electric	Medium	0	0	0	0
Düsseldorf	Passenger Cars	Battery electric	Large-SUV-Executive	0	0	0	0
Düsseldorf	Passenger Cars	Diesel PHEV	Large-SUV-Executive	-0.000180694	0.0724531	-6.74341	293.748	0.990595
Amsterdam	L-Category	Diesel	Micro-car	0	0	0	107.577
Amsterdam	L-Category	Petrol	All	-8.90547e-05	0.0294751	-2.63265	163.386	0.989787
Amsterdam	Buses	Diesel	All	-0.0160877	4.17019	-270.742	5394.03	0.881887
Amsterdam	Buses	CNG	Urban CNG Buses	-0.000231141	0.0725103	-7.37042	1448.05	0.994349
Amsterdam	Buses	Diesel Hybrid	Urban Buses Diesel Hybrid	-0.0020965	0.532537	-35.9408	1225.49	0.900569
Amsterdam	Buses	Biodiesel	Urban Biodiesel Buses	-0.000863716	0.266708	-26.4416	1413.56	0.995207
Amsterdam	Buses	Battery electric	All	0	0	0	0
Amsterdam	Buses	Diesel PHEV	All	-0.0020965	0.532537	-35.9408	1225.49	0.900569
Amsterdam	Buses	Petrol	All	-0.000655505	0.18829	-16.7771	921.955	0.971085
Amsterdam	Heavy Duty Trucks	Petrol	>3,5 t	-0.000655505	0.18829	-16.7771	921.955	0.971085
Amsterdam	Heavy Duty Trucks	Diesel	All	-0.00102969	0.320987	-32.3502	1673.8	0.993594
Amsterdam	Heavy Duty Trucks	Diesel PHEV	All	-0.0020965	0.532537	-35.9408	1225.49	0.900569
Amsterdam	Heavy Duty Trucks	Battery electric	All	0	0	0	0
Amsterdam	Heavy Duty Trucks	CNG	All	-0.000231141	0.0725103	-7.37042	1448.05	0.994349
Amsterdam	Light Commercial Vehicles	Diesel	All	-0.000478108	0.137287	-11.2345	482.44	0.977895
Amsterdam	Light Commercial Vehicles	Petrol	All	-0.000349784	0.121186	-12.089	587.043	0.991846
Amsterdam	Light Commercial Vehicles	Diesel PHEV	All	-0.000181119	0.0726235	-6.75927	294.439	0.990595
Amsterdam	Light Commercial Vehicles	Battery electric	All	0	0	0	0
Amsterdam	Light Commercial Vehicles	CNG	All	-0.000201962	0.0683116	-6.83475	351.662	0.997268
Amsterdam	Light Commercial Vehicles	Petrol Hybrid	All	-9.55926e-05	0.0366435	-3.30654	226.409	0.995853
Amsterdam	Light Commercial Vehicles	Petrol PHEV	All	-0.000194558	0.0780393	-7.26809	319.021	0.990579
Amsterdam	Passenger Cars	Petrol	Mini	-0.00026562	0.0806197	-6.96049	324.867	0.990874
Amsterdam	Passenger Cars	Petrol	Small	-0.000283476	0.0949683	-8.86064	419.157	0.997023
Amsterdam	Passenger Cars	Petrol	Medium	-0.000349821	0.116541	-10.9491	510.275	0.997644
Amsterdam	Passenger Cars	Petrol	Large-SUV-Executive	-0.000465363	0.15262	-14.9345	695.915	0.995039
Amsterdam	Passenger Cars	Diesel	Mini	-0.000166225	0.0476794	-3.78055	202.54	0.977803
Amsterdam	Passenger Cars	Diesel	Small	-0.000149216	0.0574657	-5.90155	336.972	0.996531
Amsterdam	Passenger Cars	Diesel	Medium	-0.000149216	0.0574657	-5.90155	336.972	0.996531
Amsterdam	Passenger Cars	Diesel	Large-SUV-Executive	-0.000256467	0.089482	-8.61309	454.162	0.996781
Amsterdam	Passenger Cars	CNG Bifuel	Mini	-0.000201962	0.0683116	-6.83475	351.662	0.997268
Amsterdam	Passenger Cars	CNG Bifuel	Small	-0.000201962	0.0683116	-6.83475	351.662	0.997268
Amsterdam	Passenger Cars	CNG Bifuel	Medium	-0.000201962	0.0683116	-6.83475	351.662	0.997268
Amsterdam	Passenger Cars	CNG Bifuel	Large-SUV-Executive	-0.000201962	0.0683116	-6.83475	351.662	0.997268
Amsterdam	Passenger Cars	Petrol Hybrid	Mini	-8.83439e-05	0.0321304	-2.69558	190.445	0.995729
Amsterdam	Passenger Cars	Petrol Hybrid	Small	-8.83439e-05	0.0321304	-2.69558	190.445	0.995729
Amsterdam	Passenger Cars	Petrol Hybrid	Medium	-9.20472e-05	0.0340987	-2.96541	205.192	0.995732
Amsterdam	Passenger Cars	Petrol Hybrid	Large-SUV-Executive	-9.55926e-05	0.0366435	-3.30654	226.409	0.995853
Amsterdam	Passenger Cars	Petrol PHEV	Small	-0.000137108	0.0550002	-5.1232	232.502	0.990575
Amsterdam	Passenger Cars	Petrol PHEV	Medium	-0.00016516	0.06636	-6.20025	271.563	0.990503
Amsterdam	Passenger Cars	Petrol PHEV	Large-SUV-Executive	-0.000194558	0.0780393	-7.26809	319.021	0.990579
Amsterdam	Passenger Cars	Battery electric	Small	0	0	0	0
Amsterdam	Passenger Cars	Battery electric	Medium	0	0	0	0
Amsterdam	Passenger Cars	Battery electric	Large-SUV-Executive	0	0	0	0
Amsterdam	Passenger Cars	Diesel PHEV	Large-SUV-Executive	-0.000181119	0.0726235	-6.75927	294.439	0.990595
Rotterdam	L-Category	Diesel	Micro-car	0	0	0	107.412
Rotterdam	L-Category	Petrol	All	-8.90547e-05	0.0294751	-2.63265	163.386	0.989787
Rotterdam	Buses	Diesel	All	-0.0160877	4.17019	-270.742	5394.03	0.881887
Rotterdam	Buses	CNG	Urban CNG Buses	-0.000231141	0.0725103	-7.37042	1448.05	0.994349
Rotterdam	Buses	Diesel Hybrid	Urban Buses Diesel Hybrid	-0.0020965	0.532537	-35.9408	1225.49	0.900569
Rotterdam	Buses	Biodiesel	Urban Biodiesel Buses	-0.000863716	0.266708	-26.4416	1413.56	0.995207
Rotterdam	Buses	Battery electric	All	0	0	0	0
Rotterdam	Buses	Diesel PHEV	All	-0.0020965	0.532537	-35.9408	1225.49	0.900569
Rotterdam	Buses	Petrol	All	-0.000655505	0.18829	-16.7771	921.955	0.971085
Rotterdam	Heavy Duty Trucks	Petrol	>3,5 t	-0.000655505	0.18829	-16.7771	921.955	0.971085
Rotterdam	Heavy Duty Trucks	Diesel	All	-0.00102969	0.320987	-32.3502	1673.8	0.993594
Rotterdam	Heavy Duty Trucks	Diesel PHEV	All	-0.0020965	0.532537	-35.9408	1225.49	0.900569
Rotterdam	Heavy Duty Trucks	Battery electric	All	0	0	0	0
Rotterdam	Heavy Duty Trucks	CNG	All	-0.000231141	0.0725103	-7.37042	1448.05	0.994349
Rotterdam	Light Commercial Vehicles	Diesel	All	-0.000476271	0.136859	-11.2051	481.521	0.978175
Rotterdam	Light Commercial Vehicles	Petrol	All	-0.000349002	0.120922	-12.063	585.815	0.991866
Rotterdam	Light Commercial Vehicles	Diesel PHEV	All	-0.000180842	0.0725126	-6.74894	293.989	0.990595
Rotterdam	Light Commercial Vehicles	Battery electric	All	0	0	0	0
Rotterdam	Light Commercial Vehicles	CNG	All	-0.000201664	0.0681988	-6.82304	351.032	0.997272
Rotterdam	Light Commercial Vehicles	Petrol Hybrid	All	-9.51793e-05	0.0364744	-3.28816	225.39	0.995844
Rotterdam	Light Commercial Vehicles	Petrol PHEV	All	-0.000194205	0.0778977	-7.2549	318.442	0.990579
Rotterdam	Passenger Cars	Petrol	Mini	-0.000265283	0.080498	-6.94853	324.226	0.990862
Rotterdam	Passenger Cars	Petrol	Small	-0.000283036	0.0948126	-8.8458	418.43	0.997023
Rotterdam	Passenger Cars	Petrol	Medium	-0.000349221	0.116334	-10.9292	509.35	0.997645
Rotterdam	Passenger Cars	Petrol	Large-SUV-Executive	-0.000464612	0.152363	-14.9093	694.727	0.995038
Rotterdam	Passenger Cars	Diesel	Mini	-0.000165971	0.0476066	-3.77477	202.231	0.977803
Rotterdam	Passenger Cars	Diesel	Small	-0.000148988	0.0573779	-5.89253	336.458	0.996531
Rotterdam	Passenger Cars	Diesel	Medium	-0.000148988	0.0573779	-5.89253	336.458	0.996531
Rotterdam	Passenger Cars	Diesel	Large-SUV-Executive	-0.000256075	0.0893452	-8.59993	453.468	0.996781
Rotterdam	Passenger Cars	CNG Bifuel	Mini	-0.000201664	0.0681988	-6.82304	351.032	0.997272
Rotterdam	Passenger Cars	CNG Bifuel	Small	-0.000201664	0.0681988	-6.82304	351.032	0.997272
Rotterdam	Passenger Cars	CNG Bifuel	Medium	-0.000201664	0.0681988	-6.82304	351.032	0.997272
Rotterdam	Passenger Cars	CNG Bifuel	Large-SUV-Executive	-0.000201664	0.0681988	-6.82304	351.032	0.997272
Rotterdam	Passenger Cars	Petrol Hybrid	Mini	-8.80067e-05	0.0320087	-2.68361	189.804	0.99572
Rotterdam	Passenger Cars	Petrol Hybrid	Small	-8.80067e-05	0.0320087	-2.68361	189.804	0.99572
Rotterdam	Passenger Cars	Petrol Hybrid	Medium	-9.16711e-05	0.0339563	-2.95061	204.396	0.995723
Rotterdam	Passenger Cars	Petrol Hybrid	Large-SUV-Executive	-9.51793e-05	0.0364744	-3.28816	225.39	0.995844
Rotterdam	Passenger Cars	Petrol PHEV	Small	-0.00013686	0.0549005	-5.1139	232.081	0.990575
Rotterdam	Passenger Cars	Petrol PHEV	Medium	-0.000164861	0.0662396	-6.189	271.07	0.990503
Rotterdam	Passenger Cars	Petrol PHEV	Large-SUV-Executive	-0.000194205	0.0778977	-7.2549	318.442	0.990579
Rotterdam	Passenger Cars	Battery electric	Small	0	0	0	0
Rotterdam	Passenger Cars	Battery electric	Medium	0	0	0	0
Rotterdam	Passenger Cars	Battery electric	Large-SUV-Executive	0	0	0	0
Rotterdam	Passenger Cars	Diesel PHEV	Large-SUV-Executive	-0.000180842	0.0725126	-6.74894	293.989	0.990595
The Hague	L-Category	Diesel	Micro-car	0	0	0	107.434
The Hague	L-Category	Petrol	All	-8.90547e-05	0.0294751	-2.63265	163.386	0.989787
The Hague	Buses	Diesel	All	-0.0160877	4.17019	-270.742	5394.03	0.881887
The Hague	Buses	CNG	Urban CNG Buses	-0.000231141	0.0725103	-7.37042	1448.05	0.994349
The Hague	Buses	Diesel Hybrid	Urban Buses Diesel Hybrid	-0.0020965	0.532537	-35.9408	1225.49	0.900569
The Hague	Buses	Biodiesel	Urban Biodiesel Buses	-0.000863716	0.266708	-26.4416	1413.56	0.995207
The Hague	Buses	Battery electric	All	0	0	0	0
The Hague	Buses	Diesel PHEV	All	-0.0020965	0.532537	-35.9408	1225.49	0.900569
The Hague	Buses	Petrol	All	-0.000655505	0.18829	-16.7771	921.955	0.971085
The Hague	Heavy Duty Trucks	Petrol	>3,5 t	-0.000655505	0.18829	-16.7771	921.955	0.971085
The Hague	Heavy Duty Trucks	Diesel	All	-0.00102969	0.320987	-32.3502	1673.8	0.993594
The Hague	Heavy Duty Trucks	Diesel PHEV	All	-0.0020965	0.532537	-35.9408	1225.49	0.900569
The Hague	Heavy Duty Trucks	Battery electric	All	0	0	0	0
The Hague	Heavy Duty Trucks	CNG	All	-0.000231141	0.0725103	-7.37042	1448.05	0.994349
The Hague	Light Commercial Vehicles	Diesel	All	-0.000476509	0.136914	-11.2089	481.64	0.978139
The Hague	Light Commercial Vehicles	Petrol	All	-0.000349107	0.120957	-12.0665	585.98	0.991863
The Hague	Light Commercial Vehicles	Diesel PHEV	All	-0.000180878	0.0725269	-6.75028	294.048	0.990595
The Hague	Light Commercial Vehicles	Battery electric	All	0	0	0	0
The Hague	Light Commercial Vehicles	CNG	All	-0.000201704	0.068214	-6.82461	351.116	0.997272
The Hague	Light Commercial Vehicles	Petrol Hybrid	All	-9.52348e-05	0.036497	-3.29063	225.526	0.995845
The Hague	Light Commercial Vehicles	Petrol PHEV	All	-0.000194253	0.0779167	-7.25667	318.52	0.990579
The Hague	Passenger Cars	Petrol	Mini	-0.000265328	0.0805143	-6.95013	324.312	0.990864
The Hague	Passenger Cars	Petrol	Small	-0.000283095	0.0948335	-8.8478	418.528	0.997023
The Hague	Passenger Cars	Petrol	Medium	-0.000349301	0.116362	-10.9319	509.474	0.997645
The Hague	Passenger Cars	Petrol	Large-SUV-Executive	-0.000464713	0.152397	-14.9126	694.887	0.995038
The Hague	Passenger Cars	Diesel	Mini	-0.000166004	0.047616	-3.77552	202.271	0.977803
The Hague	Passenger Cars	Diesel	Small	-0.000149017	0.0573893	-5.8937	336.524	0.996531
The Hague	Passenger Cars	Diesel	Medium	-0.000149017	0.0573893	-5.8937	336.524	0.996531
The Hague	Passenger Cars	Diesel	Large-SUV-Executive	-0.000256126	0.0893629	-8.60163	453.558	0.996781
The Hague	Passenger Cars	CNG Bifuel	Mini	-0.000201704	0.068214	-6.82461	351.116	0.997272
The Hague	Passenger Cars	CNG Bifuel	Small	-0.000201704	0.068214	-6.82461	351.116	0.997272
The Hague	Passenger Cars	CNG Bifuel	Medium	-0.000201704	0.068214	-6.82461	351.116	0.997272
The Hague	Passenger Cars	CNG Bifuel	Large-SUV-Executive	-0.000201704	0.068214	-6.82461	351.116	0.997272
The Hague	Passenger Cars	Petrol Hybrid	Mini	-8.80519e-05	0.032025	-2.68522	189.89	0.995721
The Hague	Passenger Cars	Petrol Hybrid	Small	-8.80519e-05	0.032025	-2.68522	189.89	0.995721
The Hague	Passenger Cars	Petrol Hybrid	Medium	-9.17216e-05	0.0339754	-2.9526	204.503	0.995725
The Hague	Passenger Cars	Petrol Hybrid	Large-SUV-Executive	-9.52348e-05	0.036497	-3.29063	225.526	0.995845
The Hague	Passenger Cars	Petrol PHEV	Small	-0.000136893	0.0549138	-5.11515	232.137	0.990575
The Hague	Passenger Cars	Petrol PHEV	Medium	-0.000164901	0.0662557	-6.19051	271.136	0.990503
The Hague	Passenger Cars	Petrol PHEV	Large-SUV-Executive	-0.000194253	0.0779167	-7.25667	318.52	0.990579
The Hague	Passenger Cars	Battery electric	Small	0	0	0	0
The Hague	Passenger Cars	Battery electric	Medium	0	0	0	0
The Hague	Passenger Cars	Battery electric	Large-SUV-Executive	0	0	0	0
The Hague	Passenger Cars	Diesel PHEV	Large-SUV-Executive	-0.000180878	0.0725269	-6.75028	294.048	0.990595

## Sheet: Table S4
Table S4 Validation Results of LightGBM for converting FCD sample counts to traffic volumes
City	Vehicle	Road	Sample	R2	RMSE	MAE	Time
Paris	Car	major	29074530	0.908244	383.178	212.875	1.32059
Paris	Car	middle	2816060	0.330442	163.671	80.3678	0.152337
Paris	Car	small	1197423	0.335726	123.762	67.2121	0.074197
Paris	Truck	major	29074530	0.88139	128.088	70.7701	1.3625
Paris	Truck	middle	2816060	0.376418	77.2774	38.7792	0.15188
Paris	Truck	small	1197423	0.227905	87.9158	39.2191	0.062227
Berlin	Car	major	1138492	0.663994	203.727	123.656	0.057734
Berlin	Car	middle	150828	0.860375	135.723	88.6955	0.009537
Berlin	Car	small	39072	0.882208	142.363	83.6495	0.003262

## Sheet: Table S5
Table S5 Vehicle categories
Big_cate	Category	Fuel	Segment
Car	L-Category	Diesel	Micro-car
		Petrol	All
	Buses	Diesel	All
		CNG	Urban CNG Buses
		Diesel Hybrid	Urban Buses Diesel Hybrid
		Biodiesel	Urban Biodiesel Buses
		Battery electric	All
		Diesel PHEV	All
		Petrol	All
	Passenger Cars	Petrol	Mini
			Small
			Medium
			Large-SUV-Executive
		Diesel	Mini
			Small
			Medium
			Large-SUV-Executive
		CNG Bifuel	Mini
			Small
			Medium
			Large-SUV-Executive
		Petrol Hybrid	Mini
			Small
			Medium
			Large-SUV-Executive
		Petrol PHEV	Small
			Medium
			Large-SUV-Executive
		Battery electric	Small
			Medium
			Large-SUV-Executive
		Diesel PHEV	Large-SUV-Executive
Truck	Heavy Duty Trucks	Petrol	>3,5 t
		Diesel	All
		Diesel PHEV	All
		Battery electric	All
		CNG	All
	Light Commercial Vehicles	Diesel	All
		Petrol	All
		Diesel PHEV	All
		Battery electric	All
		CNG	All
		Petrol Hybrid	All
		Petrol PHEV	All

## Sheet: Table S6
Table S6 Data sources of fleet structures
Cities	Country	Data source
Paris	France	https://www.statistiques.developpement-durable.gouv.fr/donnees-sur-le-parc-automobile-francais-au-1er-janvier-2024
Marseille
Lyon
Lille
Toulouse
Nice
Nantes
Strasbourg
Montpellier
Bordeaux
Berlin	Germany	https://www.kba.de/
Hamburg
Munich
Cologne
Frankfurt
Stuttgart
Dusseldorf
Amsterdam	Netherland	https://www.cbs.nl/
Rotterdam
The Hague

## Sheet: Table S7
Table S7 Comparison of annual emissions with other data sources
City	Data Source	Year	CO2 emission(Mt)	Difference compared to this study(%)	Reference
Amsterdam	This study	2023	2.3585	-
Amsterdam	Carbon Monitor	2023	0.613505	-0.739875	[1]
Berlin	This study	2023	7.94771	-
Berlin	Carbon Monitor	2023	1.94769	-0.754937	[1]
Berlin	Climate Trace	2023	1.99	-0.749613	[2]
Berlin	Ulrich et al,2023	2021	7.3	-0.0814968	[3]
Berlin	Anjox et al,2025	2022	2.7	-0.66028	[4]
Bordeaux	This study	2023	0.53863	-
Bordeaux	Carbon Monitor	2023	0.0906024	-0.831791	[1]
Cologne	This study	2023	4.09103	-
Cologne	Carbon Monitor	2023	0.807808	-0.802542	[1]
Dusseldorf	This study	2023	1.94664	-
Dusseldorf	Carbon Monitor	2023	0.361135	-0.814483	[1]
Dusseldorf	Climate Trace	2023	0.559	-0.712839	[2]
Frankfurt	This study	2023	2.8207	-
Frankfurt	Carbon Monitor	2023	0.434825	-0.845845	[1]
Frankfurt	Climate Trace	2023	0.719	-0.745099	[2]
Hamburg	This study	2023	6.56569	-
Hamburg	Carbon Monitor	2023	1.16678	-0.822292	[1]
Hamburg	Climate Trace	2023	1.45	-0.779155	[2]
Hamburg	Regional statistics	2023	3.32	-0.494341	[5]
Lille	This study	2023	0.427708	-
Lille	Carbon Monitor	2023	0.0762584	-0.821704	[1]
Lyon	This study	2023	0.559588	-
Lyon	Carbon Monitor	2023	0.0961401	-0.828195	[1]
Marseille	This study	2023	2.79574	-
Marseille	Carbon Monitor	2023	0.2008	-0.928176	[1]
Montpellier	This study	2023	0.667835	-
Montpellier	Carbon Monitor	2023	0.0808469	-0.878942	[1]
Munich	This study	2023	3.48321	-
Munich	Carbon Monitor	2023	0.673473	-0.806652	[1]
Munich	Kühbacher et al.,2023	2022	0.899	-0.741905	[6]
Nantes	This study	2023	0.658173	-
Nantes	Carbon Monitor	2023	0.114988	-0.825293	[1]
Nice	This study	2023	1.02509	-
Nice	Carbon Monitor	2023	0.0590657	-0.94238	[1]
Paris	This study	2023	1.93998	-
Paris	Carbon Monitor	2023	0.322002	-0.834019	[1]
Paris	Climate Trace	2023	0.697	-0.640719	[2]
Rotterdam	This study	2023	3.00467	-
Rotterdam	Carbon Monitor	2023	0.446299	-0.851465	[1]
Rotterdam	Climate Trace	2023	0.926	-0.691814	[2]
Strasbourg	This study	2023	0.837318	-
Strasbourg	Carbon Monitor	2023	0.105253	-0.874297	[1]
Stuttgart	This study	2023	2.65815	-
Stuttgart	Carbon Monitor	2023	0.30776	-0.88422	[1]
The Hague	This study	2023	1.43832	-
The Hague	Carbon Monitor	2023	0.291132	-0.797589	[1]
Toulouse	This study	2023	1.58431	-
Toulouse	Carbon Monitor	2023	0.224903	-0.858043	[1]
[1]Dou, X., Hong, J., Ciais, P., Chevallier, F., Yan, F., Yu, Y., Hu, Y., Huo, D., Sun, Y., Wang, Y., Davis, S. J., Crippa, M., Janssens-Maenhout, G., Guizzardi, D., Solazzo, E., Lin, X., Song, X., Zhu, B., Cui, D., Ke, P., Wang, H., Zhou, W., Huang, X., Deng, Z., and Liu, Z.: Near-real-time global gridded daily CO2 emissions 2021, Scientific Data, 10, 69, 10.1038/s41597-023-01963-0, 2023.
[2]Transportation Sector - Global Road Emissions,Climate TRACE Emissions Inventory: https://unfccc.int/climate-action/un-global-climate-action-awards/climate-leaders/city-of-paris, last access: 28/07/2025.
[3]Ulrich, V., Brückner, J., Schultz, M., Vardag, S. N., Ludwig, C., Fürle, J., Zia, M., Lautenbach, S., and Zipf, A.: Private Vehicles Greenhouse Gas Emission Estimation at Street Level for Berlin Based on Open Data, ISPRS International Journal of Geo-Information, 12, 138, 2023.
[4]Anjos, M. and Meier, F.: Zooming into Berlin: tracking street-scale CO2 emissions based on high-resolution traffic modeling using machine learning, Frontiers in Environmental Science, 12, 10.3389/fenvs.2024.1461656, 2025.
[5]Verkehrsdetektion Berlin: https://daten.berlin.de/datensaetze/verkehrsdetektion-berlin, last access: 28/07/2025.
[6]Kühbacher, D., Aigner, P., Super, I., Droste, A., Denier van der Gon, H., Ilic, M., and Chen, J.: Bottom-up estimation of traffic emissions in Munich based on macroscopic traffic simulation and counting data, EGU General Assembly 2023, Vienna, Austria, 24–28 Apr 2023, EGU23-12997, https://doi.org/10.5194/egusphere-egu23-12997, 2023.
